# Supplementary material for: Identification of a novel regulatory pathway for PPARα by RNA-seq characterization of the endothelial cell lipid peroxidative injury transcriptome
Source: Open Biol. 2019 Dec 18;9(12):190141. doi: 10.1098/rsob.190141 (PMC6936254; doi:10.1098/rsob.190141)
Supplement: All differentially expressed genes list [file rsob190141supp1.xlsx]

## Sheet: All
Symbol	logFC	logCPM	PValue
A1BG	0.741323	1.0512	0.167338
A2LD1	0.5759	1.72869	0.122958
A4GALT	0.55687	3.6912	0.0623938
AAAS	-0.00401446	7.24827	0.98354
AACS	0.0436089	4.29151	0.835651
AADAC	-0.273675	5.10782	0.304437
AADAT	-0.452887	2.99768	0.132004
AAGAB	-0.124054	5.89877	0.466028
AAK1	-0.214263	6.69249	0.236239
AAMP	-0.208629	5.43731	0.310847
AARS	-0.387505	8.13371	0.0843895
AARS2	-0.414557	3.84814	0.0937834
AARSD1	-0.0496882	4.25491	0.81836
AASDH	0.430151	3.09327	0.136359
AASDHPPT	-0.117405	5.54521	0.538139
AASS	0.41606	5.57726	0.0687857
AATF	-0.160446	7.02406	0.371841
ABCA1	0.973181	1.30847	0.039817
ABCA10	0.462104	0.374495	0.504541
ABCA11P	-0.293143	2.14792	0.38554
ABCA2	0.118329	7.07684	0.502137
ABCA3	0.912597	4.90526	0.0105748
ABCA4	0.674398	0.247796	0.217893
ABCA5	0.387157	3.72311	0.21813
ABCA7	-0.364796	2.90856	0.233138
ABCA8	1.44674	3.5913	0.0104887
ABCB1	0.253645	4.21716	0.273007
ABCB10	-0.240403	3.89358	0.309356
ABCB11	0.26711	1.03904	0.58418
ABCB4	2.73216	0.384083	0.00246161
ABCB6	0.0395513	3.74812	0.870611
ABCB7	0.338552	4.62617	0.132311
ABCB8	-0.443551	5.60429	0.0303545
ABCB9	0.0561194	3.88413	0.817577
ABCC1	0.175768	8.13418	0.331229
ABCC10	-0.513839	3.59475	0.070123
ABCC2	0.48872	2.32889	0.18444
ABCC3	0.89447	2.47554	0.0290562
ABCC4	0.15805	5.0384	0.379133
ABCC5	-0.235742	4.87824	0.206396
ABCC9	0.200487	4.74726	0.384996
ABCD1	0.13718	2.44895	0.702342
ABCD3	-0.109764	4.07133	0.615493
ABCD4	-0.188058	4.74493	0.326082
ABCE1	-0.215611	7.15369	0.288037
ABCF1	-0.242823	6.27639	0.164118
ABCF2	-0.249045	7.15868	0.208745
ABCF3	-0.140543	5.21133	0.476003
ABCG1	0.663596	1.63548	0.124183
ABCG2	-0.153704	4.52202	0.509779
ABHD10	-0.114388	5.25224	0.532651
ABHD11	-0.255651	4.49031	0.260239
ABHD12	0.102041	5.64971	0.549897
ABHD13	0.254739	3.83697	0.286598
ABHD14A	-0.235227	3.6118	0.367954
ABHD14B	0.27371	5.78102	0.130791
ABHD15	-0.384182	3.49738	0.168454
ABHD16A	-0.421156	3.15104	0.164804
ABHD16B	0.0402017	2.78286	0.895754
ABHD2	-0.270045	6.76043	0.168938
ABHD3	-0.310213	2.1847	0.325335
ABHD4	0.111402	5.85755	0.606129
ABHD5	0.220171	4.59502	0.267208
ABHD6	-0.0238049	3.3929	0.933372
ABHD8	0.158928	1.78878	0.653513
ABI1	-0.0258104	5.9719	0.878158
ABI2	0.296945	7.08971	0.138646
ABI3	-0.484294	6.90741	0.0243556
ABI3BP	-0.853523	5.79083	0.00698782
ABL1	-0.16278	7.73371	0.39269
ABL2	0.0259457	7.26549	0.889635
ABLIM1	-0.158651	6.13458	0.407491
ABLIM3	0.0252954	8.4164	0.895722
ABR	-0.1468	7.86341	0.408985
ABT1	-0.233233	4.21123	0.324846
ABTB1	0.199158	3.24272	0.478758
ABTB2	-0.328333	5.32462	0.109285
ACAA1	-0.228735	4.84827	0.333584
ACAA2	-0.104019	6.36397	0.526112
ACACA	-0.245198	6.56049	0.212346
ACACB	-0.0761145	3.67356	0.741099
ACAD10	0.074905	5.27909	0.66358
ACAD11	-0.450083	1.01606	0.340393
ACAD8	-0.170681	3.54785	0.491147
ACAD9	-0.0187348	5.82315	0.915865
ACADM	0.218852	5.05309	0.237335
ACADS	-0.210127	1.97968	0.538634
ACADSB	0.178861	4.83222	0.414389
ACADVL	0.101882	7.74502	0.605335
ACAP1	1.11187	0.342034	0.0757931
ACAP2	-0.167495	5.77067	0.361165
ACAP3	-0.612136	4.29087	0.0269046
ACAT1	0.247981	6.58269	0.189495
ACAT2	-0.267637	3.14895	0.350025
ACBD3	0.209636	5.32914	0.286736
ACBD4	0.209353	3.48692	0.422906
ACBD5	-0.142741	4.75182	0.450164
ACBD6	0.0616661	5.34768	0.733118
ACBD7	0.767143	3.04918	0.0807885
ACCN2	0.949702	4.22752	0.00381838
ACCN3	-0.358114	2.51714	0.312252
ACCS	-0.286094	3.81898	0.226363
ACD	-0.259199	6.02471	0.142425
ACER2	0.539966	1.68483	0.171124
ACER3	-0.30499	6.06998	0.125229
ACIN1	-0.215784	7.71641	0.235294
ACLY	0.0550186	8.54809	0.769846
ACO1	0.19128	6.64105	0.327537
ACO2	-0.219288	5.93188	0.258043
ACOT1	-0.0564254	2.12333	0.874849
ACOT11	-0.878792	2.44667	0.0240138
ACOT13	0.270661	4.91706	0.159824
ACOT2	-0.298722	4.43102	0.186765
ACOT7	-0.37139	6.27294	0.0838722
ACOT8	0.189481	4.61576	0.337756
ACOT9	-0.338979	5.99119	0.0764024
ACOX1	-0.00125761	4.73077	0.998483
ACOX2	-0.316012	2.97215	0.254677
ACOX3	0.0637273	3.42567	0.793044
ACP1	0.0707474	5.60021	0.68318
ACP2	-0.329181	4.88634	0.198842
ACP5	1.71266	1.4297	0.0236405
ACP6	0.664362	0.92669	0.16081
ACPL2	0.227234	3.9125	0.349419
ACSBG1	0.56768	0.254583	0.283071
ACSF2	1.17956	4.63649	0.00121856
ACSF3	0.0647177	4.02771	0.770945
ACSL1	0.0444604	4.86839	0.808292
ACSL3	0.285789	5.97557	0.168358
ACSL4	0.0491242	8.92467	0.816719
ACSL5	0.481002	4.56311	0.0620068
ACSM4	0.0204274	2.30299	0.970964
ACSS2	0.0952149	5.38455	0.655897
ACTA2	0.80025	4.34774	0.00806882
ACTB	-0.263709	12.6232	0.263259
ACTG1	-0.0483025	12.5242	0.82547
ACTL6A	-0.155178	5.61205	0.422655
ACTN1	0.0732728	9.6848	0.701398
ACTN4	-0.199227	11.0584	0.350941
ACTR10	0.050933	5.45211	0.785306
ACTR1A	0.0432135	7.27198	0.798323
ACTR1B	0.0980263	4.61133	0.614756
ACTR2	-0.11722	7.66409	0.518621
ACTR3	-0.220268	8.00888	0.243548
ACTR3B	-0.150367	2.86445	0.577473
ACTR5	-0.485236	3.87929	0.0782519
ACTR6	0.0717819	3.8229	0.774133
ACTR8	-0.0458692	4.49339	0.814846
ACVR1	0.118799	5.07285	0.537393
ACVR1B	0.237534	5.76713	0.209854
ACVR2A	0.0108782	3.46374	0.968453
ACVR2B	0.205559	4.64492	0.311821
ACVRL1	0.441468	8.11294	0.0628923
ACY3	0.349733	0.100454	0.625861
ACYP1	-0.111939	3.32659	0.697223
ACYP2	-0.222872	0.659001	0.67216
ADA	0.415091	6.81674	0.0393364
ADAL	0.0653365	2.90275	0.821676
ADAM1	-0.360469	2.53375	0.246669
ADAM10	0.0314666	7.25951	0.85703
ADAM15	0.0630836	8.32801	0.72781
ADAM17	0.301268	5.75993	0.119238
ADAM19	0.367307	5.89075	0.0618054
ADAM22	0.22009	3.61086	0.401008
ADAM23	0.765882	2.96924	0.0243959
ADAM8	-0.337126	1.20619	0.429229
ADAM9	-0.155947	7.87466	0.470694
ADAMTS1	0.312364	6.49759	0.236329
ADAMTS10	0.419359	3.91407	0.141931
ADAMTS16	-0.367617	2.97846	0.203156
ADAMTS18	0.832192	1.14409	0.0800167
ADAMTS6	0.133798	5.823	0.499678
ADAMTS7	1.47366	6.08287	0.000818348
ADAMTSL1	0.304594	0.768928	0.625534
ADAMTSL4	-0.0885077	3.68818	0.712279
ADAMTSL5	-0.639008	4.14186	0.0180669
ADAR	-0.105163	8.04954	0.581431
ADARB1	0.262864	5.43335	0.171776
ADAT1	-0.176918	4.82207	0.369857
ADAT2	0.0659701	3.24474	0.79934
ADAT3	0.0768481	2.41966	0.829538
ADC	1.20272	1.77094	0.0195636
ADCK1	0.135068	2.7663	0.665337
ADCK2	-0.35404	4.45866	0.157103
ADCK3	0.34321	4.40187	0.131119
ADCK4	-0.224851	4.34939	0.34583
ADCK5	-0.234675	3.22859	0.365772
ADCY2	0.0467654	3.24781	0.891883
ADCY3	-0.0978729	5.59188	0.585839
ADCY4	0.342719	2.72628	0.322242
ADCY6	0.0741339	5.90415	0.651442
ADCY7	0.0798978	3.27453	0.752419
ADCY9	-0.203377	4.88898	0.292608
ADD1	0.0715446	7.78388	0.685058
ADD2	-0.222059	5.48241	0.256672
ADD3	0.584668	5.89409	0.0216524
ADH5	0.14668	5.84519	0.435925
ADI1	-0.301181	5.88522	0.143883
ADIPOR1	0.0793062	6.76762	0.633028
ADIPOR2	0.03774	6.32875	0.826256
ADK	0.102446	5.44159	0.577363
ADM	0.703406	4.55324	0.00950718
ADNP	-0.0372223	6.98049	0.826002
ADNP2	-0.04745	5.34953	0.790783
ADO	-0.0852054	4.39881	0.683348
ADORA1	-0.171149	3.58553	0.55322
ADORA2A	0.824062	1.09014	0.100417
ADORA2B	0.182838	2.43282	0.570415
ADPGK	-0.23721	5.4417	0.20851
ADPRHL1	0.10542	0.590546	0.8556
ADPRHL2	-0.203453	4.44856	0.344593
ADRB1	-0.699698	0.349646	0.237978
ADRB2	-0.123411	6.27724	0.529899
ADRBK1	-0.061517	6.24483	0.705911
ADRBK2	-0.151856	2.45975	0.642958
ADRM1	-0.216361	8.47846	0.310972
ADSL	-0.19055	6.06162	0.302116
ADSS	0.402281	6.4907	0.117715
ADSSL1	1.82608	1.23353	0.0050238
ADTRP	0.244457	6.18182	0.246436
AEBP2	0.452683	5.40653	0.031856
AEN	-0.283776	6.53686	0.128981
AES	-0.0514048	8.32332	0.775475
AFAP1	-0.0484427	7.64677	0.783897
AFAP1L1	0.129511	3.49946	0.611177
AFF1	-0.244435	6.01167	0.210841
AFF3	0.289441	5.63327	0.175136
AFF4	-0.125548	7.57104	0.504463
AFG3L1P	-0.105588	3.57703	0.662994
AFG3L2	0.223671	6.74059	0.193387
AFMID	-0.2287	4.95305	0.262392
AFTPH	-0.125386	4.76967	0.556886
AGA	0.0544692	4.10996	0.801942
AGAP1	-0.183991	4.52738	0.386467
AGAP2	-0.0968129	1.97303	0.832916
AGAP3	-0.0386747	6.16853	0.821954
AGAP5	-0.425342	0.024155	0.490311
AGAP6	-0.413524	1.71001	0.324511
AGAP9	-0.499696	1.27949	0.251045
AGBL5	0.453626	5.59024	0.0456109
AGER	0.291074	1.51539	0.493016
AGFG1	0.0339468	6.49327	0.834651
AGFG2	0.333593	5.24087	0.0861327
AGGF1	0.018449	4.79057	0.921755
AGK	-0.160579	5.43051	0.373788
AGL	-0.314234	4.87744	0.118264
AGMAT	-0.0953515	1.46968	0.829681
AGMO	0.796721	2.11712	0.102016
AGPAT1	-0.282934	5.77191	0.114925
AGPAT2	-0.0484506	6.22865	0.76637
AGPAT3	-0.0795131	6.38565	0.627863
AGPAT4	0.104631	3.79319	0.643031
AGPAT4-IT1	-0.00451983	0.685405	1
AGPAT5	0.0805662	6.9347	0.674441
AGPAT6	-0.280296	5.48119	0.121712
AGPAT9	0.167031	3.19514	0.635444
AGPHD1	0.385858	0.973934	0.414581
AGPS	-0.128374	5.83404	0.503974
AGRN	0.424133	6.79164	0.0362177
AGTPBP1	0.0671307	3.88753	0.763699
AGTRAP	-0.640319	5.25934	0.0301476
AGXT2L2	0.150028	3.40174	0.548994
AHCTF1	-0.166223	6.78464	0.334369
AHCY	0.1517	8.51623	0.412246
AHCYL1	0.480657	7.06062	0.0379308
AHCYL2	0.247717	4.29006	0.258565
AHDC1	0.282286	4.75632	0.193254
AHI1	0.287123	4.96424	0.182485
AHNAK	-0.381675	11.1039	0.144356
AHNAK2	-0.517742	9.4582	0.03385
AHR	0.83937	4.83779	0.0117493
AHRR	-0.420288	5.00857	0.104731
AHSA1	-0.103462	7.64234	0.595727
AHSA2	0.120831	4.80294	0.62267
AIDA	-0.0806718	6.86635	0.657007
AIF1L	0.510314	1.42795	0.345888
AIFM1	-0.0533589	5.6984	0.759989
AIFM2	-0.470498	4.74754	0.0610201
AIG1	0.234957	3.70402	0.321592
AIM1	0.750759	1.96966	0.133524
AIMP1	0.141476	5.4475	0.453176
AIMP2	-0.158736	5.00127	0.433029
AIP	0.413476	5.92502	0.03556
AJUBA	-0.127366	6.69302	0.481712
AK1	0.117344	5.85204	0.541724
AK2	-0.172932	7.2873	0.350337
AK3	0.35392	5.5265	0.08833
AK4	-0.026254	1.66095	0.958973
AKAP1	-0.150545	6.22587	0.393245
AKAP10	-0.0640394	4.88788	0.726985
AKAP11	-0.288184	5.66722	0.136489
AKAP12	0.838473	8.82299	0.00417562
AKAP13	0.142707	6.27338	0.387921
AKAP17A	-0.142179	4.99996	0.441938
AKAP2	0.714365	1.63099	0.162948
AKAP5	0.0315135	0.713354	0.975209
AKAP6	0.403362	3.06323	0.246892
AKAP7	0.440211	2.11847	0.221592
AKAP8	-0.0121851	5.33138	0.946816
AKAP8L	0.197348	5.82607	0.339021
AKAP9	-0.0431787	7.31502	0.819315
AKD1	0.514996	3.90022	0.100817
AKIP1	-0.201001	3.98401	0.393871
AKIRIN1	0.118311	5.42813	0.492127
AKIRIN2	-0.00457483	5.00051	0.983771
AKIRIN2-AS1	0.908957	0.32042	0.139299
AKNA	0.0724295	5.3753	0.698352
AKR1A1	-0.0286206	5.45372	0.879169
AKR1B1	0.207035	7.49373	0.2509
AKR1B10	0.161999	1.33456	0.724055
AKR1C1	0.365033	0.462674	0.518694
AKR1C3	0.14102	3.46868	0.635955
AKR1E2	-0.0358871	3.26221	0.9097
AKR7A2	-0.224955	5.9372	0.195549
AKT1	-0.226023	7.62944	0.213573
AKT1S1	-0.342892	7.201	0.0858371
AKT2	-0.165671	6.21385	0.317289
AKT3	-0.117744	6.77461	0.504751
AKTIP	-0.193699	4.33601	0.356505
ALAD	-0.0262889	5.84945	0.875128
ALAS1	0.0806284	6.69723	0.629498
ALCAM	-0.202496	9.16363	0.3647
ALDH16A1	-0.307048	4.95863	0.136356
ALDH18A1	0.102654	6.45312	0.544807
ALDH1A1	1.57218	6.57026	0.000708456
ALDH1A3	-0.131866	5.40844	0.689303
ALDH1B1	-0.303414	4.48763	0.16007
ALDH1L1	1.26893	2.66038	0.0049726
ALDH1L2	-0.698984	4.89041	0.0240414
ALDH3A2	0.262509	6.58687	0.161592
ALDH3B1	0.509938	2.86334	0.126822
ALDH4A1	0.0717856	4.20654	0.735947
ALDH6A1	0.475863	3.20372	0.134173
ALDH7A1	0.397591	6.55335	0.0590716
ALDH9A1	0.0200619	5.17087	0.910486
ALDOA	-0.121636	10.0153	0.549194
ALG1	-0.553893	4.36718	0.0358357
ALG10	-0.571559	2.67973	0.0902162
ALG10B	-0.388442	3.44093	0.149399
ALG11	0.0626854	0.597164	0.906552
ALG12	-0.228145	5.09744	0.242511
ALG13	0.0181461	6.07749	0.916294
ALG14	-0.323983	1.91656	0.428092
ALG2	0.102343	4.82963	0.599672
ALG3	-0.338763	6.54139	0.0836565
ALG5	-0.255886	3.04677	0.341925
ALG6	-0.250417	3.05022	0.408335
ALG8	-0.358262	5.48533	0.10923
ALG9	-0.0541368	5.08559	0.764172
ALKBH1	-0.0178898	4.20466	0.936584
ALKBH2	-0.0676358	4.08892	0.771178
ALKBH3	0.0270233	4.79863	0.905153
ALKBH4	-0.352086	2.72383	0.226172
ALKBH5	-0.189023	5.30679	0.31349
ALKBH6	-0.179884	3.98317	0.402766
ALKBH7	0.523065	4.37535	0.0362049
ALKBH8	-0.289043	4.75256	0.171703
ALMS1	-0.434448	5.25317	0.0474407
ALOX12	0.0364658	1.51291	0.951322
ALOX12P2	0.216407	0.814284	0.651311
ALOXE3	1.0498	0.511033	0.15695
ALPK1	0.0926065	5.08651	0.622232
ALPK3	-0.429991	0.972825	0.357414
ALS2	0.0642462	5.51889	0.711164
ALS2CL	-0.592757	5.22343	0.0330125
ALS2CR8	0.615962	2.08186	0.108623
ALX1	0.0930986	2.54808	0.751806
ALX3	0.023108	1.09765	0.979542
ALYREF	-0.134566	6.33984	0.495303
AMACR	-0.493182	0.162595	0.38205
AMBRA1	0.0904244	5.57039	0.615628
AMD1	-0.378675	5.36439	0.106351
AMDHD2	0.110411	3.59596	0.633989
AMFR	0.0866715	6.87927	0.616637
AMH	-0.527655	2.97633	0.213898
AMIGO2	0.779939	5.47592	0.00535061
AMIGO3	-0.324249	3.10479	0.264778
AMMECR1	-0.321191	4.32253	0.145813
AMMECR1L	-0.256898	4.94568	0.173944
AMN1	1.08318	3.66172	0.0093266
AMOT	1.40704	0.517169	0.0481918
AMOTL1	0.10259	6.21565	0.625132
AMOTL2	-0.163063	7.3577	0.39344
AMPD2	0.165919	6.43988	0.328847
AMT	0.469046	1.93442	0.276689
AMTN	0.298202	4.74307	0.279648
AMY2B	0.17707	1.19152	0.702986
AMZ2	0.184702	7.69984	0.300124
AMZ2P1	0.147748	3.91547	0.503368
ANAPC1	-0.0811103	6.59376	0.696662
ANAPC10	0.195757	3.18815	0.483867
ANAPC11	-0.0315806	4.80758	0.868166
ANAPC13	0.0904813	5.67492	0.62126
ANAPC16	0.103797	4.81647	0.587439
ANAPC2	-0.211653	5.67019	0.300585
ANAPC4	-0.227839	4.09388	0.335457
ANAPC5	-0.238977	7.02322	0.183493
ANAPC7	-0.147498	6.42528	0.388735
ANG	0.465393	2.35969	0.174115
ANGEL1	0.0195599	5.32826	0.909691
ANGEL2	-0.224936	4.63896	0.285464
ANGPT1	-0.246356	2.73737	0.445609
ANGPT4	-1.64332	0.478745	0.0138627
ANGPTL2	0.477447	4.33443	0.0453495
ANGPTL4	-0.741369	6.38983	0.0294999
ANK1	-0.213041	0.173396	0.802962
ANK2	-0.917196	1.83417	0.0347033
ANK3	0.521013	4.33052	0.0990118
ANKAR	-0.543647	1.36451	0.203148
ANKDD1A	0.0427013	2.89871	0.876486
ANKFN1	0.346542	4.27477	0.140083
ANKFY1	-0.315743	6.69855	0.117503
ANKH	-0.0584018	5.27614	0.734338
ANKHD1	0.721132	1.2106	0.12688
ANKIB1	-0.024416	5.95401	0.885691
ANKLE2	-0.140635	6.0709	0.431157
ANKMY1	-0.0782241	2.15943	0.812615
ANKMY2	0.306069	4.23319	0.155665
ANKRA2	0.198928	3.49174	0.430927
ANKRD1	-0.667242	8.649	0.00745684
ANKRD10	0.253243	4.72831	0.228143
ANKRD11	-0.0873766	9.37631	0.697883
ANKRD12	0.231638	7.19828	0.294337
ANKRD13A	0.0704609	5.78763	0.663503
ANKRD13B	-0.046557	5.7895	0.784061
ANKRD13C	0.0825156	4.67948	0.659544
ANKRD13D	-0.242915	4.85552	0.250245
ANKRD16	0.0972182	2.62842	0.758471
ANKRD17	0.0700851	7.70046	0.687949
ANKRD18B	0.235618	4.69503	0.314938
ANKRD20A9P	-0.182928	4.40792	0.442593
ANKRD23	0.101123	1.57812	0.814461
ANKRD24	-0.262142	1.05512	0.688508
ANKRD26	-0.215746	5.71232	0.314504
ANKRD27	0.140169	6.09476	0.393983
ANKRD28	0.558591	8.38821	0.0523302
ANKRD29	0.346958	2.34885	0.371765
ANKRD30B	0.41095	1.94025	0.286579
ANKRD32	-0.4509	4.43886	0.0592521
ANKRD33B	-0.128944	5.68627	0.537314
ANKRD34A	0.0950547	2.78826	0.742052
ANKRD36	0.0253807	4.91802	0.898268
ANKRD36B	-0.0778688	4.46193	0.746488
ANKRD36BP1	-0.877895	1.65995	0.0710681
ANKRD39	-0.178051	2.64554	0.524641
ANKRD40	-0.134432	6.51093	0.428027
ANKRD42	0.00408878	2.77394	1
ANKRD44	0.774724	2.45841	0.0292691
ANKRD46	0.184557	2.30983	0.585843
ANKRD49	-0.148701	3.56195	0.54973
ANKRD5	0.230209	2.8561	0.432157
ANKRD50	0.0447677	6.08603	0.803293
ANKRD52	-0.524572	7.5636	0.0276029
ANKRD54	-0.545577	4.2742	0.0461469
ANKRD55	0.0523241	1.91194	0.898662
ANKRD9	0.151611	1.65493	0.70017
ANKS1A	-0.222814	4.90267	0.29288
ANKS3	-0.011286	3.67108	0.967018
ANKS6	0.145293	5.24492	0.483241
ANKZF1	0.202794	4.36826	0.390364
ANLN	-0.386904	7.65868	0.152053
ANO10	0.546651	6.00938	0.0113197
ANO3	0.473548	0.118105	0.451851
ANO6	0.359569	7.86843	0.0812997
ANO7	0.31567	0.0142827	0.607762
ANO8	-0.369257	3.54686	0.22619
ANP32A	0.0983278	7.06786	0.555413
ANP32B	0.22045	7.26972	0.225983
ANP32E	-0.0796204	5.89539	0.709238
ANPEP	0.00994485	10.1588	0.960456
ANTXR1	0.664596	9.03998	0.0109455
ANTXR2	0.115884	6.90653	0.639736
ANXA1	-0.365824	8.67786	0.0780283
ANXA11	-0.0283681	7.74885	0.867549
ANXA2	-0.461141	10.84	0.0449285
ANXA3	0.0768117	4.96204	0.76202
ANXA4	-0.0710832	5.92962	0.683704
ANXA5	0.218308	10.0992	0.287792
ANXA6	0.380281	6.0654	0.0516735
ANXA7	-0.103371	6.27233	0.5423
ANXA9	0.027842	0.541775	0.974151
AOC2	-0.279955	2.78945	0.340878
AOC3	-0.288834	2.4099	0.434901
AOX1	-0.306052	4.77399	0.293985
AP1AR	0.0385607	4.73464	0.851075
AP1B1	-0.187453	7.28435	0.327901
AP1G1	-0.219853	6.91924	0.235041
AP1G2	-0.211761	6.66296	0.255894
AP1M1	-0.442062	7.23935	0.0320242
AP1S1	0.218403	5.62871	0.238933
AP1S2	0.188504	3.575	0.425168
AP1S3	-0.0727891	3.84381	0.75564
AP2A1	-0.149866	7.01484	0.387976
AP2A2	0.00446656	6.72522	0.979265
AP2B1	-0.222702	8.80833	0.254351
AP2M1	-0.172207	8.4125	0.352332
AP2S1	-0.320564	6.40919	0.118552
AP3B1	-0.0803173	6.69053	0.634341
AP3D1	-0.0092374	8.47951	0.959427
AP3M1	-0.120514	6.84577	0.49373
AP3M2	0.361061	4.28037	0.115731
AP3S1	0.0970832	5.19755	0.664663
AP4B1	-0.218685	3.47633	0.392435
AP4E1	-0.0321228	3.39933	0.905887
AP4M1	-0.0391478	3.40927	0.887825
AP4S1	-0.394279	3.08979	0.144877
AP5B1	-0.425844	4.50799	0.0841997
APAF1	-0.259402	4.85334	0.242595
APBA1	0.904044	3.78566	0.00540223
APBA2	-0.324314	3.92058	0.171204
APBA3	-0.363032	4.78036	0.104296
APBB1	0.206182	4.76485	0.301074
APBB2	0.251867	7.25056	0.194497
APBB3	-0.238594	4.04875	0.349714
APC	-0.310872	6.38941	0.0958958
APC2	0.00857082	4.31038	0.971825
APCDD1L	0.0416999	3.22287	0.893181
APEH	0.0254107	5.06593	0.891554
APEX1	0.0734418	8.32983	0.684643
APEX2	-0.228548	6.02217	0.202832
APH1A	-0.0376004	5.91725	0.824853
APH1B	0.319069	4.85303	0.109311
API5	-0.0397812	7.46411	0.829157
APIP	0.737724	4.57059	0.0102093
APITD1	-0.21174	1.41071	0.64609
APLF	0.758444	2.35324	0.0432702
APLN	1.60882	7.68705	0.00391752
APLP1	0.243045	6.30768	0.170465
APLP2	0.433447	10.3009	0.066399
APOA1BP	0.0159896	6.00795	0.923532
APOBEC3B	-0.254779	5.18638	0.345633
APOBEC3C	0.0752231	6.95237	0.686337
APOBEC3D	0.125541	2.78595	0.678786
APOBEC3F	0.404766	3.97188	0.119012
APOBEC3G	0.52149	3.05129	0.0941844
APOBEC3H	1.18915	0.68882	0.0423594
APOL1	0.947021	3.24644	0.00885821
APOL2	0.295227	5.00204	0.15948
APOL3	1.20615	3.5635	0.00526429
APOL6	-0.232383	4.93371	0.235982
APOLD1	0.344982	2.04487	0.354045
APOO	-0.258233	3.73924	0.31126
APOOL	-0.0575614	4.27422	0.789927
APOPT1	0.248621	5.00134	0.228647
APP	0.846712	10.2772	0.00437854
APPBP2	0.314739	5.68535	0.0994104
APPL1	-0.159026	5.59261	0.439061
APPL2	0.2254	6.01163	0.19915
APRT	-0.0500678	6.28188	0.76751
APTX	0.184593	3.92148	0.415071
AQP1	1.48918	0.693625	0.0536196
AQP11	-0.25404	0.864651	0.597544
AQP7P1	0.138799	2.32921	0.667248
AQP7P3	1.0215	0.696145	0.0747878
AQR	-0.13837	6.66194	0.43413
AR	0.557533	6.93703	0.0282579
ARAF	-0.18917	6.27539	0.255904
ARAP1	-0.150992	7.03419	0.405976
ARAP3	-0.030337	7.58896	0.85922
ARC	-0.241581	1.52298	0.521591
ARCN1	0.102152	8.32856	0.593419
AREG	-0.542874	1.78565	0.249977
ARF1	-0.0575694	8.76746	0.751317
ARF3	-0.110306	8.0996	0.538344
ARF4	0.151908	7.11078	0.404714
ARF5	-0.0491044	5.63289	0.784443
ARF6	-0.130908	6.97424	0.443924
ARFGAP1	0.0193943	6.82146	0.909365
ARFGAP2	-0.240829	5.67435	0.193988
ARFGAP3	0.352093	5.20553	0.102187
ARFGEF1	-0.00228601	5.73175	0.99183
ARFGEF2	-0.00305796	7.73872	0.987749
ARFIP1	-0.0787344	4.56419	0.714452
ARFIP2	0.0857099	5.79843	0.610623
ARFRP1	0.0564788	5.13496	0.754847
ARG2	0.782058	3.53427	0.0126362
ARGLU1	-0.171062	5.33611	0.382606
ARHGAP1	-0.314446	6.95883	0.0962789
ARHGAP10	0.437601	5.03613	0.0518429
ARHGAP11A	-0.175185	6.91626	0.416678
ARHGAP11B	-0.268942	2.26742	0.441887
ARHGAP12	0.0844247	5.4377	0.639395
ARHGAP17	-0.0972036	7.77226	0.597221
ARHGAP18	0.276061	6.25558	0.24746
ARHGAP19	-0.274325	2.86826	0.345753
ARHGAP21	-0.0184585	7.69307	0.920837
ARHGAP22	0.460576	5.98671	0.0291553
ARHGAP23	-0.676447	8.73567	0.0118634
ARHGAP24	0.0169923	6.89221	0.917964
ARHGAP26	0.282395	4.54998	0.209926
ARHGAP27	0.515966	2.40584	0.128115
ARHGAP29	0.0756256	8.82016	0.693122
ARHGAP30	0.0728429	1.14255	0.879052
ARHGAP31	-0.194967	6.82266	0.289082
ARHGAP32	0.0666049	5.10004	0.709936
ARHGAP33	-0.515018	4.12724	0.0628364
ARHGAP35	-0.00842582	7.01188	0.963064
ARHGAP39	-0.235035	5.0408	0.269907
ARHGAP4	-0.182998	5.82413	0.278941
ARHGAP42	0.0724362	2.91191	0.815163
ARHGAP5	0.178657	6.78406	0.361225
ARHGAP5-AS1	0.555501	2.97915	0.118823
ARHGDIA	-0.455282	9.23445	0.0571144
ARHGDIB	-0.0145654	8.77576	0.946051
ARHGEF1	-0.219398	6.84998	0.239011
ARHGEF10	0.170975	7.27871	0.407676
ARHGEF10L	-0.23249	2.248	0.481351
ARHGEF11	-0.255477	6.23037	0.162701
ARHGEF12	0.0314751	7.75601	0.85989
ARHGEF15	-0.0701294	4.23885	0.729371
ARHGEF16	0.901253	-0.178911	0.217988
ARHGEF17	0.484139	5.83223	0.0175541
ARHGEF18	-0.329472	5.97059	0.109367
ARHGEF19	-0.274981	2.56353	0.355566
ARHGEF2	-0.177707	7.21145	0.401857
ARHGEF25	0.223882	5.26534	0.293583
ARHGEF26	-0.242641	3.17054	0.34877
ARHGEF3	0.157228	4.99188	0.391649
ARHGEF37	0.886929	1.585	0.0685549
ARHGEF40	0.176723	5.08825	0.382881
ARHGEF7	0.102535	5.41996	0.548542
ARHGEF9	0.22806	4.81785	0.287687
ARID1A	-0.277267	7.52664	0.151147
ARID1B	-0.151814	6.56221	0.384823
ARID2	-0.0267557	6.17347	0.871891
ARID3A	-0.181153	4.25437	0.420868
ARID3B	-0.0532637	3.99588	0.858577
ARID4A	0.386294	5.70895	0.0893448
ARID4B	0.0614104	6.46187	0.750336
ARID5A	0.602267	2.46642	0.0692327
ARID5B	0.73053	4.02979	0.0181661
ARIH1	0.0965496	6.30945	0.58182
ARIH2	-0.19894	6.19015	0.270866
ARL1	0.298914	6.25553	0.100103
ARL13A	0.256007	1.87509	0.496657
ARL13B	0.00322404	5.48393	0.986999
ARL14	0.318369	1.18807	0.510318
ARL15	-0.333567	2.00521	0.333906
ARL16	-0.0231691	4.73554	0.910308
ARL17A	-0.199326	4.13304	0.393602
ARL2	0.27561	6.80792	0.135555
ARL2BP	-0.306341	6.30024	0.0819736
ARL3	0.308777	5.59312	0.168238
ARL4A	-0.168848	3.26364	0.524512
ARL4C	0.447945	4.69479	0.0397212
ARL4D	0.416259	2.11329	0.311523
ARL5A	-0.107176	4.71558	0.632872
ARL5B	-0.000880483	4.20544	0.999917
ARL6	-0.518617	2.78739	0.118667
ARL6IP1	0.0532696	7.48431	0.826103
ARL6IP4	0.173896	7.07958	0.324204
ARL6IP5	0.072043	6.80562	0.691314
ARL6IP6	0.0479783	4.77367	0.815356
ARL8A	-0.0126764	4.99108	0.951478
ARL8B	-0.0306523	7.1078	0.854895
ARMC1	0.00355369	4.73806	0.988631
ARMC10	0.0353609	5.24185	0.862062
ARMC2	-0.069566	2.45931	0.814162
ARMC4	0.292896	5.75574	0.145981
ARMC5	-0.497255	4.01037	0.0536194
ARMC6	-0.444197	5.0701	0.0622846
ARMC7	-0.868282	4.22131	0.00855481
ARMC8	-0.0540947	4.7295	0.777916
ARMC9	0.215996	3.7946	0.36923
ARMCX1	0.0560563	3.56573	0.818946
ARMCX3	0.103652	5.96524	0.528925
ARMCX4	0.314033	3.20131	0.257291
ARMCX5	-0.125079	4.57781	0.525549
ARMCX6	0.0627898	6.08408	0.699457
ARNT	0.339337	5.29171	0.0821562
ARNT2	2.44961	0.228013	0.00531358
ARNTL	0.176612	3.82938	0.440024
ARNTL2	-0.19263	8.24617	0.349197
ARPC1A	-0.250731	7.59374	0.165669
ARPC1B	-0.415361	7.87803	0.0584051
ARPC2	0.0240895	7.2589	0.887039
ARPC3	0.277792	7.31172	0.139402
ARPC4	-0.32547	6.08483	0.126534
ARPC5	-0.338559	7.18859	0.0814275
ARPC5L	-0.133101	5.4437	0.5078
ARPM1	-0.207188	0.825074	0.674776
ARPP19	0.0319949	6.86186	0.861528
ARRB1	0.624233	5.61155	0.00901868
ARRB2	0.259122	6.41756	0.2076
ARRDC1	-0.327839	5.79817	0.102312
ARRDC2	-0.153936	4.63288	0.454344
ARRDC3	0.17213	4.88309	0.359862
ARSA	0.0955423	4.39573	0.64605
ARSB	-0.31365	4.75125	0.173906
ARSD	0.189652	3.70582	0.434396
ARSE	0.0952835	3.12242	0.728146
ARSG	1.05552	2.36436	0.00890321
ARSJ	-0.0588879	5.96802	0.746361
ARSK	0.0687157	5.07993	0.759093
ARV1	0.0944232	3.18007	0.713056
ARVCF	0.643737	3.45722	0.0427239
ASAH1	0.336327	4.01839	0.15785
ASAH2	-1.25009	0.332772	0.0446834
ASAH2B	-0.921983	0.330813	0.157658
ASAP1	-0.0607038	9.37631	0.75836
ASAP2	-0.147224	8.04887	0.435977
ASAP3	0.285972	5.42568	0.169115
ASB1	-0.283877	3.18976	0.272301
ASB13	0.282824	2.64895	0.377268
ASB16	-0.395178	1.54974	0.335588
ASB6	-0.158828	5.24325	0.406575
ASB7	0.0558644	4.38881	0.785465
ASB8	-0.029178	5.07296	0.874292
ASB9	-0.0216439	3.72814	0.941526
ASCC1	0.0713397	4.68376	0.708555
ASCC2	-0.245836	6.23082	0.165646
ASCC3	-0.199517	7.2324	0.3394
ASF1A	-0.0681537	4.49244	0.729773
ASF1B	-0.243694	6.19066	0.209562
ASGR1	0.729227	1.34974	0.0988369
ASH1L	-0.148755	6.12705	0.39772
ASH2L	0.100566	5.57968	0.553579
ASL	-0.42852	5.29112	0.0434501
ASMTL	0.579521	4.72551	0.0379615
ASMTL-AS1	0.0707303	0.851527	0.88857
ASNA1	-0.110742	6.29564	0.512004
ASNS	-1.22161	5.46843	0.0118749
ASNSD1	-0.132416	5.52383	0.47734
ASPH	0.140244	8.78864	0.455905
ASPHD1	0.138418	2.31154	0.681928
ASPHD2	0.556053	1.48689	0.194674
ASPM	-0.260074	6.97138	0.363315
ASPSCR1	-0.026451	5.07905	0.883656
ASRGL1	-0.134811	1.95411	0.689823
ASS1	0.943554	4.74626	0.00785223
ASTE1	-0.231407	2.60971	0.435702
ASTN2	0.128184	3.77384	0.628609
ASUN	-0.187263	6.58463	0.276496
ASXL1	0.105587	7.53323	0.56086
ASXL2	-0.0863458	6.1752	0.693721
ATAD1	0.0661802	5.03839	0.708838
ATAD2	-0.407147	6.48211	0.0626317
ATAD2B	-0.0542627	3.13366	0.845996
ATAD3A	-0.385371	5.74295	0.0819217
ATAD3B	-1.23022	3.40394	0.00416717
ATAD5	-0.429301	5.34548	0.0607311
ATAT1	0.139583	3.60765	0.565561
ATE1	-0.170287	3.6954	0.515697
ATF1	-0.211645	4.89988	0.283461
ATF2	-0.0601002	5.39595	0.742346
ATF3	-0.020214	3.49295	0.941895
ATF4	-0.301498	8.16592	0.262283
ATF5	-0.121756	4.56706	0.577799
ATF6	-0.049603	7.11527	0.766287
ATF6B	0.0541786	6.44063	0.740339
ATF7	-0.218935	6.09429	0.22294
ATF7IP	-0.0236122	6.63977	0.901935
ATG10	0.158703	2.1086	0.632789
ATG12	0.0102589	5.73988	0.954977
ATG13	-0.0691151	6.77021	0.687686
ATG14	0.341904	4.62269	0.121175
ATG16L1	-0.189733	4.48808	0.358825
ATG16L2	0.232067	3.93365	0.397659
ATG2A	-0.177186	6.1425	0.338315
ATG2B	-0.182991	5.67307	0.30656
ATG3	-0.0353637	6.50338	0.838673
ATG4A	0.265278	6.14448	0.143324
ATG4B	-0.0704852	4.57479	0.720285
ATG4C	0.162188	3.80939	0.511008
ATG4D	-0.568744	3.53321	0.0598817
ATG5	0.15763	4.77833	0.445482
ATG7	-0.386306	5.5074	0.0505134
ATG9A	-0.210042	5.63343	0.255508
ATG9B	-1.85738	2.9292	0.00205546
ATHL1	-0.388033	5.44777	0.0932044
ATIC	-0.0594545	6.26246	0.733649
ATL1	0.491146	1.64146	0.247639
ATL2	0.136157	4.29162	0.5289
ATL3	-0.525361	5.8787	0.0355233
ATM	-0.00688349	6.36501	0.97125
ATMIN	-0.14275	6.05097	0.388724
ATN1	-0.0136377	8.72233	0.940968
ATOH8	0.83282	3.14407	0.0642
ATOX1	-0.117928	4.80654	0.608021
ATP10D	0.121062	4.94573	0.509128
ATP11A	0.233719	5.57168	0.323366
ATP11B	0.184607	5.49393	0.380666
ATP11C	0.248744	6.53618	0.246665
ATP13A1	-0.29375	6.59565	0.148325
ATP13A2	-0.118562	5.94712	0.644388
ATP13A3	-0.125082	6.2029	0.461443
ATP1A1	0.213606	9.092	0.292737
ATP1A3	-0.127957	3.47442	0.639401
ATP1B1	0.606928	6.50001	0.00857486
ATP1B3	0.2417	6.91843	0.180238
ATP2A1	-0.111154	1.48974	0.798136
ATP2A2	-0.303354	8.39839	0.141262
ATP2A3	0.642773	3.34817	0.0550978
ATP2B1	0.073841	4.86302	0.693239
ATP2B2	0.101724	0.472601	0.870946
ATP2B4	-0.582933	7.1724	0.0103907
ATP2C1	0.0128687	6.47878	0.940064
ATP2C2	-0.908036	0.683165	0.129121
ATP5A1	-0.0915775	7.41428	0.619343
ATP5B	-0.295592	9.7891	0.154712
ATP5C1	-0.0234166	6.95345	0.889681
ATP5D	0.246724	5.36795	0.223106
ATP5F1	-0.255209	6.72933	0.200377
ATP5G1	0.495987	5.20136	0.0499795
ATP5G2	0.711409	8.12823	0.0154915
ATP5G3	-0.170395	5.38508	0.402513
ATP5H	-0.269657	6.23722	0.227425
ATP5I	-0.516928	3.1269	0.151648
ATP5J	0.661231	7.09199	0.0109725
ATP5J2	0.00496839	5.68749	0.982499
ATP5L	0.921921	8.01203	0.00462014
ATP5O	-0.0704887	6.7532	0.70215
ATP5S	0.520564	2.47525	0.129492
ATP5SL	0.0110209	5.69271	0.94931
ATP6AP1	0.120266	6.76992	0.513417
ATP6AP2	0.290505	6.57344	0.145078
ATP6V0A1	-0.351736	6.09761	0.0635686
ATP6V0A2	0.0450731	4.57762	0.820951
ATP6V0A4	0.368139	1.32198	0.405052
ATP6V0B	-0.572388	4.67736	0.0218918
ATP6V0C	0.01737	8.00455	0.92557
ATP6V0D1	-0.0133441	6.17476	0.94117
ATP6V0E1	0.242316	6.1672	0.153543
ATP6V0E2	-0.140103	6.38367	0.438711
ATP6V1A	0.179113	6.17115	0.277696
ATP6V1B2	-0.0700877	6.38743	0.668041
ATP6V1C1	0.0581862	5.81432	0.733608
ATP6V1D	-0.0719867	5.50163	0.672072
ATP6V1E1	0.344153	5.4497	0.0851843
ATP6V1E2	-0.190044	2.53394	0.553642
ATP6V1F	-0.200099	5.89178	0.362144
ATP6V1G1	-0.0145653	6.79169	0.937766
ATP6V1H	0.138645	4.96412	0.464282
ATP7A	-0.183252	3.71086	0.442793
ATP8B1	0.321742	6.55176	0.165367
ATP8B2	-0.170128	6.89079	0.325507
ATP8B3	-0.129009	2.31018	0.716571
ATP9A	0.277323	6.37285	0.136976
ATP9B	-0.60699	4.41052	0.0180439
ATPAF1	-0.072115	3.69607	0.761572
ATPAF2	0.183717	3.94879	0.442545
ATPBD4	0.0645137	2.85708	0.826665
ATPIF1	-0.137117	5.96449	0.48516
ATR	-0.257434	5.77267	0.178866
ATRIP	-0.365551	3.38967	0.158341
ATRN	0.139677	7.43747	0.414882
ATRX	0.19016	7.86636	0.384112
ATXN1	0.274064	4.78752	0.168749
ATXN10	0.282315	5.77641	0.120032
ATXN1L	-0.153624	5.95827	0.407734
ATXN2	0.223891	7.54164	0.219025
ATXN2L	0.031288	8.88295	0.867221
ATXN3	-0.206013	4.06357	0.365507
ATXN7	-0.0700829	5.166	0.691558
ATXN7L1	-0.0740102	3.89412	0.762213
ATXN7L2	-0.37532	2.6075	0.265654
ATXN7L3	-0.191884	5.85452	0.299435
ATXN7L3B	-0.0681391	6.59534	0.687277
AUH	-0.00778211	2.62769	0.990663
AUP1	-0.155669	6.63029	0.404444
AURKA	0.0133634	7.09606	0.944268
AURKAIP1	-0.159076	5.78947	0.377982
AURKB	-0.251629	6.04893	0.232622
AVEN	-0.26865	3.16833	0.337804
AVIL	-0.411157	2.38301	0.291411
AVL9	-0.111206	4.44825	0.590281
AVPI1	0.000711603	3.06461	1
AXIN1	-0.225572	5.46521	0.270802
AXIN2	0.320841	1.59895	0.427268
AXL	-0.244951	10.5525	0.262461
AZI1	0.105239	5.31569	0.583898
AZI2	0.11942	5.77962	0.492201
AZIN1	-0.191638	6.79295	0.308498
B2M	0.29019	8.35781	0.15487
B3GALNT2	0.00487831	5.20544	0.981537
B3GALT6	-0.182165	3.50882	0.50048
B3GALTL	-0.0360132	3.37805	0.89284
B3GAT3	-0.363768	4.7301	0.196179
B3GNT1	0.147418	5.54749	0.416648
B3GNT2	-0.137106	3.94368	0.541981
B3GNT3	0.219557	0.855687	0.643419
B3GNT5	-0.540424	1.46939	0.181361
B3GNT9	0.587742	3.69251	0.0319647
B3GNTL1	0.0960354	3.48373	0.715446
B4GALNT1	-0.408897	5.30693	0.0648291
B4GALNT4	0.27165	4.4453	0.251938
B4GALT1	-0.0359086	6.43723	0.825058
B4GALT2	-0.139451	6.47792	0.400603
B4GALT3	-0.0776689	5.00882	0.706983
B4GALT4	-0.319496	4.18094	0.175097
B4GALT5	-0.474547	7.69204	0.0258033
B4GALT6	0.204306	5.00414	0.366132
B4GALT7	0.153525	5.33725	0.410663
B7H6	-0.642093	3.51024	0.0549119
B9D1	0.289086	4.1031	0.224184
B9D2	-0.231049	2.06503	0.510638
BABAM1	-0.124349	6.30278	0.441001
BACE1	-0.0139694	5.41554	0.938608
BACE1-AS	0.253213	0.188335	0.646718
BACE2	0.464177	6.18961	0.0252502
BACH1	0.153279	5.94295	0.443031
BAD	-0.202838	4.43693	0.422967
BAG1	-0.283646	2.92555	0.346395
BAG2	-0.0841158	5.29274	0.6629
BAG3	-0.155796	7.40004	0.411963
BAG4	-0.0901046	5.08096	0.613225
BAG5	-0.189644	5.93342	0.29012
BAG6	-0.000505158	7.87285	0.998051
BAHCC1	0.363753	4.74017	0.0794304
BAHD1	-0.102012	5.22487	0.579866
BAI2	0.609742	3.80832	0.0291259
BAI3	-0.344209	3.75689	0.295754
BAIAP2	-0.0330041	5.26231	0.849183
BAIAP2L1	0.0467012	3.96459	0.841886
BAK1	-0.611625	4.43282	0.0337226
BAMBI	-0.640554	0.362538	0.249324
BANF1	-0.0415352	7.3825	0.824474
BANP	-0.158522	3.97545	0.574461
BAP1	-0.311558	6.37496	0.108191
BARD1	-0.378545	2.85878	0.224159
BASP1	0.137015	6.32045	0.406552
BATF2	-0.210499	4.02033	0.375367
BATF3	0.512302	0.716037	0.294338
BAX	0.00644966	6.46199	0.971933
BAZ1A	-0.192189	7.71573	0.280994
BAZ1B	-0.163235	7.57255	0.363608
BAZ2A	0.0598673	8.04035	0.756381
BAZ2B	0.213559	5.22391	0.253839
BBC3	0.494444	3.791	0.0783465
BBIP1	0.279413	3.71504	0.236732
BBS1	-0.102064	5.35741	0.562707
BBS10	-0.246657	5.40753	0.207286
BBS12	0.432659	2.9645	0.192516
BBS2	0.434574	6.30678	0.0313968
BBS4	-0.15054	4.45098	0.483311
BBS5	-0.540403	1.3814	0.198015
BBS7	0.172554	4.80715	0.380802
BBS9	0.0636547	3.58532	0.788412
BBX	-0.0364334	7.87309	0.834179
BCAM	0.436688	5.36505	0.0423667
BCAN	0.229005	4.55133	0.329558
BCAP29	0.194919	6.08271	0.276739
BCAP31	-0.16219	7.0614	0.402825
BCAR1	0.0890798	8.87155	0.636438
BCAR3	-0.144315	6.25155	0.418616
BCAS1	0.6797	1.52545	0.128558
BCAS2	-0.223958	4.73546	0.296071
BCAS3	0.221584	5.61025	0.224487
BCAS4	-0.136218	4.01427	0.543107
BCAT1	-0.373024	7.89852	0.0683935
BCAT2	-0.512964	5.50542	0.0228623
BCCIP	-0.0664529	5.66401	0.717997
BCDIN3D	0.12511	0.694869	0.834193
BCHE	0.504207	5.97353	0.0333217
BCKDHA	0.326122	5.86833	0.0991817
BCKDHB	0.551172	3.18555	0.057064
BCKDK	0.138227	6.84773	0.413976
BCL10	-0.0320861	4.84074	0.864118
BCL11A	0.173063	2.87607	0.541907
BCL2A1	0.647178	2.67056	0.0897595
BCL2L1	0.11303	8.24224	0.565619
BCL2L11	0.775011	3.35133	0.0140645
BCL2L12	-0.266275	4.69175	0.192526
BCL2L13	0.0538689	5.25348	0.754895
BCL2L2	0.00702206	5.09917	0.971321
BCL3	-0.169656	5.03686	0.342081
BCL6	0.35231	4.72772	0.178839
BCL6B	0.466065	4.09663	0.0664287
BCL7A	0.0495794	4.14219	0.823686
BCL7B	-0.212496	5.27008	0.279745
BCL7C	-0.18849	5.35971	0.300085
BCL9	0.0199274	4.99607	0.916209
BCL9L	-0.499404	8.42806	0.0402854
BCLAF1	-0.398582	7.57334	0.0456064
BCO2	0.940376	2.2109	0.0297014
BCOR	-0.194154	6.39598	0.282376
BCORL1	0.432853	5.22502	0.0398152
BCR	0.0702824	7.22553	0.673264
BCS1L	-0.532495	4.23778	0.0454801
BDH2	0.313358	3.91275	0.192765
BDNF	0.308393	5.61878	0.135376
BDNF-AS1	-0.163729	0.0930317	0.784052
BDP1	-0.211114	6.32666	0.252371
BECN1	-0.3932	5.7716	0.0469754
BEND3	-0.351864	3.35176	0.258403
BEND7	0.579159	2.87509	0.0567102
BET1	0.476142	4.73508	0.0539149
BET1L	-0.249809	5.85779	0.168104
BFAR	-0.0732756	6.02554	0.652776
BFSP1	1.4924	4.13541	0.000699709
BGN	2.57665	1.52585	0.00234416
BHLHB9	-0.0346517	3.86172	0.887327
BHLHE40	0.252172	6.63034	0.430835
BHLHE41	0.487942	0.759036	0.339944
BICD1	0.10359	5.57987	0.571187
BICD2	-0.0600713	6.03809	0.737992
BID	-0.141253	4.86642	0.486356
BIN1	0.234619	6.72876	0.225759
BIN3	-0.0204177	4.13412	0.927782
BIRC2	-0.241574	5.72637	0.179557
BIRC5	-0.141512	6.38045	0.501243
BIRC6	-0.0731944	6.56029	0.695141
BIVM	0.398243	2.00327	0.303774
BLCAP	-0.238694	5.61389	0.205069
BLID	0.296209	0.739648	0.568423
BLK	0.438105	3.92732	0.109134
BLM	-0.40602	5.22084	0.0575989
BLMH	0.303325	5.61039	0.100502
BLOC1S1	0.202745	3.50943	0.416839
BLOC1S2	-0.271705	4.17534	0.210907
BLOC1S3	-0.183982	3.45077	0.459773
BLVRA	0.42498	3.5101	0.13132
BLVRB	-0.163391	5.77789	0.425009
BLZF1	-0.0577765	4.20374	0.787007
BMF	1.54147	2.08134	0.00831266
BMI1	-0.619079	2.04632	0.0998507
BMP1	-0.0178149	5.34381	0.91927
BMP2K	-0.300489	4.47902	0.17665
BMP6	0.379725	5.80204	0.0522687
BMPR1A	-0.298226	4.35198	0.158014
BMPR2	-0.257029	7.55489	0.210106
BMS1	0.0125194	6.77198	0.940193
BMS1P4	-0.157353	1.37421	0.701492
BNC1	-0.0271777	4.38717	0.896637
BNC2	0.0804088	5.44668	0.800111
BNIP1	0.129216	3.09515	0.633807
BNIP2	0.0672659	5.59151	0.696672
BNIP3	0.228398	6.44477	0.23805
BNIP3L	0.262502	7.1431	0.2158
BOD1	0.121654	5.54232	0.484229
BOD1L	0.158795	7.77744	0.402243
BOK	-0.129942	4.91349	0.483685
BOLA1	-0.299022	1.98	0.412775
BOLA3	-0.833782	4.16454	0.0126589
BOLA3-AS1	0.702343	1.65011	0.082592
BOP1	-0.53095	6.90592	0.0256439
BORA	-0.49789	3.3497	0.125234
BPGM	0.237281	5.54279	0.27496
BPHL	0.258274	2.85371	0.35432
BPNT1	0.106943	4.57541	0.590782
BPTF	-0.0802595	8.1756	0.646503
BRAF	-0.0765858	3.47496	0.751894
BRAP	0.0617659	5.07294	0.734627
BRAT1	-0.360312	5.76555	0.0620437
BRCA1	-0.507761	6.60242	0.030021
BRCA2	-0.688942	5.01736	0.0160829
BRCC3	-0.314294	4.92218	0.150614
BRD1	0.145936	5.363	0.413124
BRD2	-0.328266	7.57052	0.101188
BRD3	0.141786	6.66056	0.434367
BRD4	-0.0645743	8.38843	0.719368
BRD7	0.132953	6.97836	0.434881
BRD8	-0.0256356	6.69942	0.880257
BRD9	-0.108083	4.89422	0.58286
BRE	0.220191	5.35848	0.252394
BRF1	-0.20752	5.19131	0.305074
BRF2	-0.177934	3.39144	0.505106
BRI3	-0.229493	5.68042	0.255222
BRI3BP	-0.39186	3.62952	0.133562
BRIP1	-0.391097	5.54357	0.0823573
BRIX1	-0.136231	4.89573	0.468815
BRK1	-0.119183	6.46793	0.513615
BRMS1	-0.456202	5.96221	0.0373297
BRMS1L	-0.0650966	4.13392	0.7729
BROX	-0.261084	4.78389	0.190655
BRP44	-0.291573	4.516	0.166952
BRP44L	0.552444	1.36811	0.177472
BRPF1	-0.178479	6.0911	0.372151
BRPF3	-0.255857	5.46269	0.232337
BRSK1	0.151714	3.08302	0.558764
BRSK2	-0.0127791	0.122264	1
BRWD1	0.231641	5.00177	0.240292
BRWD3	0.225904	5.0939	0.254914
BSCL2	-0.437669	1.31227	0.287366
BSDC1	0.055888	5.62412	0.766467
BSG	0.355121	9.80813	0.102866
BSN	-0.590627	1.05585	0.23302
BST1	0.41233	3.32621	0.139277
BST2	1.62251	0.100753	0.026342
BTAF1	-0.0256895	5.48618	0.891448
BTBD1	0.0479023	6.25561	0.77049
BTBD10	0.087148	6.3863	0.596251
BTBD11	-0.0597044	1.13898	0.909786
BTBD19	-0.283034	4.47328	0.25781
BTBD2	0.143769	7.6899	0.41325
BTBD3	-0.0434891	5.83166	0.800935
BTBD6	-0.558152	4.68483	0.0263625
BTBD7	-0.0351427	5.83358	0.836637
BTBD9	-0.292699	3.58762	0.2733
BTD	0.466032	5.66582	0.0331065
BTF3	0.209866	8.9778	0.269405
BTF3L4	0.119805	5.51148	0.501411
BTG1	0.105286	5.59703	0.572708
BTG2	0.126682	5.58145	0.551406
BTG3	0.268367	4.77545	0.183848
BTN2A1	-0.35912	4.17973	0.105007
BTN2A2	0.279674	3.3499	0.269005
BTN2A3P	-0.219007	0.766931	0.679448
BTN3A1	0.212251	4.39106	0.371664
BTN3A2	0.511416	5.52675	0.0261599
BTN3A3	0.244628	3.9851	0.388729
BTRC	-0.0147724	5.06498	0.936306
BUB1	-0.22139	6.74012	0.318686
BUB1B	-0.0191896	6.24207	0.933608
BUB3	-0.256142	6.93403	0.181219
BUD13	0.161418	5.14677	0.374017
BUD31	-0.425314	5.05235	0.0958097
BVES	0.388564	0.705988	0.454465
BYSL	-0.3256	4.16097	0.153712
BZW1	0.0391792	8.22857	0.832741
BZW2	0.508295	6.17556	0.0218627
C10orf10	2.70465	2.78339	0.00123549
C10orf114	-0.345548	2.84546	0.283052
C10orf116	-0.520474	4.2069	0.0552395
C10orf118	-0.104866	4.18545	0.6502
C10orf12	-0.252857	3.4787	0.336377
C10orf125	0.495566	3.3243	0.0800693
C10orf137	-0.114231	4.2332	0.574924
C10orf140	-0.352925	0.402795	0.508241
C10orf2	-0.332504	5.1749	0.0991695
C10orf25	0.150866	1.83223	0.693822
C10orf26	0.163719	5.24751	0.356194
C10orf28	-0.0806873	3.93641	0.723838
C10orf32	0.258095	1.94987	0.545856
C10orf46	-0.0987095	5.45678	0.562854
C10orf47	-0.659037	3.48143	0.0333217
C10orf54	-0.862363	5.1483	0.00303362
C10orf55	0.343114	0.484552	0.556402
C10orf58	0.706299	8.18372	0.00551712
C10orf76	-0.0518687	4.41726	0.801669
C10orf88	0.209348	4.07565	0.355454
C11orf1	0.650132	5.12396	0.00935229
C11orf10	0.389255	3.91534	0.119599
C11orf2	0.174765	6.92636	0.313705
C11orf24	-0.3082	5.80162	0.111601
C11orf30	-0.00236476	6.19268	0.990949
C11orf31	0.283486	5.93491	0.194494
C11orf35	-0.377547	1.70108	0.377938
C11orf41	0.0143709	7.83314	0.944031
C11orf45	-0.214914	2.17582	0.514133
C11orf46	0.0386244	4.21926	0.854707
C11orf48	-0.363887	6.25866	0.136826
C11orf49	0.150589	5.40259	0.398231
C11orf51	0.0059958	1.39986	1
C11orf54	0.202454	3.91629	0.45599
C11orf57	0.0542262	5.67691	0.746775
C11orf58	-0.0243634	6.92832	0.884386
C11orf61	0.00840853	4.32861	0.972116
C11orf63	-0.108285	1.01818	0.815901
C11orf67	0.151538	3.89925	0.539774
C11orf68	-0.416354	6.2566	0.0514929
C11orf71	0.0800441	2.30505	0.794586
C11orf73	0.316406	4.66611	0.157094
C11orf74	0.367247	4.06877	0.120709
C11orf75	-0.00243579	1.86628	1
C11orf80	0.0772217	4.29748	0.720041
C11orf82	-0.537176	5.1203	0.0224718
C11orf83	-0.219323	3.59507	0.386908
C11orf84	-0.0100859	6.34447	0.956526
C11orf9	0.922082	2.48923	0.0191581
C11orf91	-0.724594	4.13998	0.00990541
C11orf95	-0.12742	4.79224	0.522027
C12orf10	-0.159772	6.21434	0.422871
C12orf23	0.167317	6.15834	0.454761
C12orf26	0.152435	1.10408	0.735317
C12orf29	-0.0934421	4.45623	0.636779
C12orf32	-0.00225308	6.58529	0.990263
C12orf34	-1.49188	4.33971	0.000832852
C12orf35	0.599077	7.44972	0.0188368
C12orf4	-0.43471	4.22317	0.062181
C12orf43	-0.272317	4.70263	0.175508
C12orf44	-0.165527	5.47321	0.449327
C12orf45	-1.04808	3.7517	0.00968098
C12orf47	0.465859	3.70603	0.09915
C12orf49	-0.277798	4.98193	0.151707
C12orf5	-0.0127836	5.53659	0.944559
C12orf51	-0.221225	6.58373	0.2269
C12orf52	0.0144265	5.61368	0.935984
C12orf57	0.382004	6.60537	0.0501041
C12orf60	-0.491557	1.0539	0.258631
C12orf65	0.328675	4.30487	0.168654
C12orf66	-0.125598	3.28821	0.65997
C12orf68	0.214513	1.98133	0.574977
C12orf73	0.039261	3.51656	0.891746
C12orf75	-0.197979	4.84379	0.30549
C12orf76	0.886017	1.47609	0.0489403
C13orf15	1.29778	2.08403	0.00797475
C14orf1	0.0683058	5.34727	0.705773
C14orf101	0.10702	4.53503	0.595811
C14orf102	-0.0860575	4.56279	0.67655
C14orf109	0.0358215	2.94459	0.901925
C14orf118	-0.0734726	4.07979	0.740278
C14orf119	0.00448686	5.6529	0.981849
C14orf126	-0.2494	3.9481	0.285967
C14orf129	0.00934614	3.87314	0.972122
C14orf133	0.157427	5.55439	0.363347
C14orf135	-0.0101316	5.64627	0.960937
C14orf142	-0.291333	3.34506	0.280579
C14orf149	-0.0536265	4.96546	0.774427
C14orf159	-0.0812934	6.36062	0.621629
C14orf166	0.331608	7.27835	0.0811126
C14orf167	0.0543819	4.766	0.777117
C14orf169	-0.459251	4.30616	0.0567252
C14orf176	-0.666903	0.525654	0.213817
C14orf2	-0.0123476	6.19966	0.953245
C14orf21	-0.276462	4.1594	0.282489
C14orf28	1.12002	1.35342	0.0344581
C14orf39	-0.258229	0.646691	0.623034
C14orf43	0.504509	7.52817	0.0216688
C14orf45	0.110116	1.16697	0.819346
C14orf49	0.0470148	4.10087	0.862129
C14orf79	-0.212827	3.90598	0.450184
C14orf80	-0.260878	4.62156	0.220989
C14orf93	0.611157	4.57012	0.0226775
C15orf17	-0.193444	4.84504	0.345704
C15orf23	-0.545757	6.50577	0.0233574
C15orf24	0.00640436	5.49808	0.972275
C15orf29	-0.372032	4.68689	0.101402
C15orf33	0.529041	0.95772	0.235955
C15orf38	0.411127	3.39245	0.166986
C15orf39	-0.0719646	6.76637	0.688713
C15orf40	0.128376	3.25704	0.623288
C15orf41	-0.115542	4.33324	0.58212
C15orf42	-0.282301	5.39304	0.18572
C15orf44	-0.0218738	6.07815	0.893445
C15orf5	0.293951	0.530252	0.673421
C15orf52	-0.492075	7.14649	0.0188813
C15orf54	0.729361	5.30112	0.0650119
C15orf57	-0.382197	3.12679	0.169917
C15orf58	-0.27952	1.43802	0.501418
C15orf61	-0.060971	-0.0154667	0.970996
C15orf62	0.102514	0.890064	0.81541
C16orf13	-0.160882	6.31512	0.345856
C16orf42	-0.324886	5.08409	0.109428
C16orf45	0.347536	6.13833	0.0895845
C16orf46	-0.312632	1.10613	0.529666
C16orf48	0.166418	4.35605	0.441407
C16orf5	0.246532	3.98646	0.304836
C16orf52	0.0435902	4.81056	0.815798
C16orf53	-0.249567	5.58199	0.174113
C16orf55	-0.158927	3.1492	0.595216
C16orf57	-0.598613	5.93907	0.0153761
C16orf58	0.115686	6.3729	0.483645
C16orf59	-0.431182	3.83842	0.113655
C16orf62	0.0919609	6.34696	0.585222
C16orf7	0.340542	3.28411	0.274035
C16orf70	-0.230156	4.94248	0.221957
C16orf72	-0.187179	5.073	0.342395
C16orf74	-0.19127	4.74221	0.408948
C16orf79	-0.0770106	1.16958	0.874826
C16orf80	-0.0215809	6.65785	0.89547
C16orf87	0.289056	3.10993	0.304482
C16orf88	-0.0776359	5.95814	0.667704
C16orf91	-0.193541	2.82685	0.469628
C16orf95	-0.0288	0.830089	0.979097
C17orf100	0.780358	2.05073	0.0584185
C17orf101	-0.136577	5.23747	0.452297
C17orf103	0.760483	3.07596	0.054498
C17orf104	0.199997	0.690065	0.679226
C17orf108	0.90827	0.829958	0.182545
C17orf39	0.0890251	4.64821	0.650458
C17orf48	0.367761	2.63287	0.271576
C17orf51	-0.627197	4.99002	0.0155308
C17orf53	-0.240558	4.22795	0.258648
C17orf56	-0.427294	4.42745	0.0861273
C17orf57	-0.0799752	3.57588	0.73714
C17orf58	-0.261055	3.77273	0.298098
C17orf59	0.0557998	3.28952	0.863665
C17orf61	-0.433831	2.58394	0.203244
C17orf62	-0.234123	5.61825	0.260591
C17orf63	0.0464773	6.42782	0.776533
C17orf65	-0.0878621	3.04117	0.741894
C17orf67	0.694208	0.786777	0.170143
C17orf69	0.448741	1.61216	0.257438
C17orf70	-0.206634	5.25931	0.325786
C17orf72	-0.52425	4.91321	0.0282075
C17orf75	-0.0292815	4.12757	0.895275
C17orf76-AS1	0.271071	7.47741	0.178742
C17orf79	-0.026719	4.19106	0.913741
C17orf80	-0.0708428	5.21946	0.69552
C17orf81	-0.121656	5.26826	0.49463
C17orf85	-0.0511046	6.06393	0.75882
C17orf89	-0.0116463	2.12357	0.974319
C17orf90	-0.0797068	3.57735	0.771844
C17orf96	-0.129226	4.29604	0.57268
C17orf97	0.304258	1.61486	0.470474
C18orf1	0.91035	0.912952	0.0897692
C18orf21	0.201333	3.87088	0.401424
C18orf25	-0.168503	4.34679	0.427388
C18orf32	1.28947	0.355947	0.0990427
C18orf34	0.782749	2.30817	0.0850826
C18orf54	-0.166117	4.28754	0.508005
C18orf8	0.105833	4.68631	0.614406
C19orf10	0.0314803	6.81464	0.856505
C19orf12	-0.105856	4.27406	0.623687
C19orf24	-0.225478	4.63449	0.281876
C19orf25	-0.413337	4.34747	0.122792
C19orf26	-0.302621	2.7647	0.334707
C19orf29	-0.354134	5.2211	0.068058
C19orf40	-0.570434	2.77637	0.068021
C19orf42	0.0925858	5.53824	0.609044
C19orf43	-0.102638	6.93926	0.591461
C19orf44	-0.215927	3.56462	0.373562
C19orf45	2.192	0.173024	0.0113359
C19orf47	-0.576864	4.68377	0.0271238
C19orf48	-0.24025	6.96672	0.193745
C19orf51	-0.137789	5.65837	0.4289
C19orf52	-0.0223497	3.29097	0.937147
C19orf53	0.162779	7.23685	0.381909
C19orf54	0.424056	4.99671	0.0486263
C19orf55	-0.507801	5.19646	0.0223893
C19orf6	-0.0991321	6.87019	0.58514
C19orf60	-0.698396	4.26747	0.0350914
C19orf63	-0.476709	6.50626	0.0481163
C19orf66	0.254704	5.14996	0.207512
C19orf70	0.11276	4.53366	0.57829
C19orf71	-0.484095	1.50371	0.259712
C19orf76	-0.377201	1.72116	0.379435
C19orf79	-0.454101	1.70451	0.302999
C19orf81	-1.05785	0.372156	0.111532
C1D	0.206411	2.08444	0.550618
C1GALT1	-0.051749	4.83018	0.81168
C1GALT1C1	0.278081	6.04098	0.199162
C1QBP	-0.133182	6.85091	0.439619
C1QL1	1.54734	1.55291	0.030886
C1QL3	1.00434	0.535498	0.0865719
C1QL4	0.503783	3.43943	0.0711794
C1QTNF6	-0.153997	4.63287	0.474075
C1RL	0.414836	4.518	0.0804866
C1orf109	-0.14207	3.93237	0.521019
C1orf110	-0.0656537	1.81043	0.891214
C1orf112	-0.278041	3.93693	0.300924
C1orf114	0.0961985	1.77363	0.812428
C1orf115	0.38892	6.27811	0.0536115
C1orf122	-0.028249	3.53506	0.925446
C1orf123	-0.0268906	5.07472	0.884565
C1orf124	-0.127325	3.8001	0.582491
C1orf131	-0.259318	3.37682	0.32077
C1orf133	-0.27818	2.40616	0.393623
C1orf135	-0.33843	2.92192	0.286513
C1orf144	-0.347337	7.9091	0.090553
C1orf159	-0.127375	4.20828	0.543782
C1orf170	-0.323375	1.76856	0.381052
C1orf174	-0.0466278	4.82367	0.805271
C1orf192	0.613619	2.0994	0.0893371
C1orf198	0.05417	4.19913	0.793385
C1orf201	-0.0235721	3.80421	0.925246
C1orf21	0.412895	5.11297	0.0696588
C1orf212	-0.241555	5.09051	0.20996
C1orf213	0.423625	1.26488	0.321411
C1orf216	0.0174522	4.73828	0.930366
C1orf226	-0.0505588	4.28705	0.841498
C1orf27	-0.0242891	4.94349	0.905098
C1orf31	0.515548	3.24262	0.0666421
C1orf35	0.0769467	3.86917	0.789944
C1orf38	1.02806	1.74914	0.0283928
C1orf43	0.0238239	6.57337	0.888713
C1orf50	-0.227135	2.36715	0.507915
C1orf52	-0.00261197	3.86147	0.997021
C1orf53	-0.646976	0.573095	0.236052
C1orf55	-0.0598256	3.88793	0.790773
C1orf56	0.235642	3.97972	0.287326
C1orf63	-0.366658	4.14482	0.146413
C1orf74	-0.0146258	2.21075	0.965558
C1orf85	0.140068	5.86992	0.438768
C1orf86	-0.0506085	4.33349	0.825672
C1orf9	0.0997148	5.005	0.575009
C1orf96	0.260683	3.24607	0.311568
C20orf11	-0.000765208	6.2223	0.997424
C20orf111	0.169466	5.75467	0.307233
C20orf112	0.210014	8.24007	0.266363
C20orf132	0.861249	0.655889	0.128279
C20orf160	1.12038	3.51348	0.022592
C20orf194	0.251919	5.18584	0.189017
C20orf196	0.179104	0.614927	0.719027
C20orf20	0.0285992	5.85126	0.872951
C20orf27	-0.322991	6.69199	0.0993751
C20orf29	-0.443682	4.94093	0.0740965
C20orf3	-0.0148297	7.32704	0.930026
C20orf30	0.162071	7.66321	0.354133
C20orf4	-0.196995	6.20326	0.270239
C20orf43	0.0455939	7.13634	0.785336
C20orf7	0.0537014	4.07183	0.813788
C20orf72	-0.045696	6.11964	0.799377
C20orf94	-0.192399	3.12436	0.50588
C20orf96	0.0552775	5.4521	0.75531
C21orf119	0.30461	2.56831	0.358675
C21orf15	-0.555572	0.323579	0.364841
C21orf2	-0.0880936	2.77891	0.789081
C21orf33	0.0212214	5.10265	0.910658
C21orf56	-0.0693791	2.90289	0.808951
C21orf58	0.0620006	3.58109	0.803725
C21orf59	0.0946657	5.42962	0.627808
C21orf63	0.102855	4.20823	0.646409
C21orf67	0.00529388	1.19049	1
C21orf7	1.50071	2.70381	0.00184667
C21orf90	-0.213031	1.30334	0.630221
C22orf13	0.146314	6.72993	0.391374
C22orf23	-0.0875317	3.90216	0.696177
C22orf25	-0.219071	4.54117	0.3237
C22orf28	-0.0319592	6.41835	0.843243
C22orf29	-0.0596065	5.39159	0.756602
C22orf32	0.406972	3.19377	0.147237
C22orf34	-0.694759	0.625492	0.187113
C22orf39	0.329289	3.88568	0.158698
C22orf40	-0.0501395	3.43876	0.843117
C22orf46	-0.355177	4.48627	0.200203
C2CD2	0.652121	4.82463	0.0129926
C2CD2L	-0.263073	4.49519	0.310469
C2CD3	-0.466747	5.53773	0.0526773
C2CD4C	0.723042	-0.0402373	0.338193
C2orf16	0.293333	1.25158	0.538303
C2orf18	-0.478405	5.54093	0.0273524
C2orf27A	0.56031	0.0039669	0.349468
C2orf28	0.123074	6.62132	0.472365
C2orf29	-0.067815	5.86086	0.699708
C2orf42	-0.010102	3.78715	0.968327
C2orf43	0.177597	4.42061	0.400623
C2orf44	-0.594899	4.05373	0.0270463
C2orf47	-0.519999	4.01833	0.0457852
C2orf49	-0.201909	2.91614	0.458958
C2orf51	0.0569046	1.299	0.897504
C2orf55	0.296302	0.75011	0.608923
C2orf56	0.428319	3.72097	0.103646
C2orf63	0.13134	3.09786	0.730432
C2orf68	0.083002	5.02839	0.641882
C2orf69	-0.128707	3.96635	0.59658
C2orf72	1.26706	0.583366	0.0588186
C2orf74	0.25581	4.12108	0.277297
C2orf76	0.0499523	1.42384	0.927434
C2orf81	0.122072	1.63656	0.790211
C2orf88	0.0319124	1.37258	0.970966
C2orf89	-0.0924261	3.65003	0.692832
C3orf14	-0.283257	4.05279	0.221783
C3orf17	0.149941	5.96168	0.41663
C3orf19	-0.013167	5.15393	0.945883
C3orf23	0.394362	4.60911	0.0781832
C3orf26	-0.261024	6.25818	0.164528
C3orf33	0.439978	1.46652	0.273518
C3orf37	-0.0855781	4.75579	0.660781
C3orf38	-0.0970694	4.55682	0.63769
C3orf39	0.00322463	4.81744	0.991847
C3orf52	-0.0128837	2.20578	0.98877
C3orf58	0.345841	4.9039	0.0854483
C3orf62	0.0229688	3.06383	0.937376
C3orf64	-0.0615861	5.52634	0.714868
C3orf67	0.154668	5.00232	0.42531
C3orf72	0.0350953	1.38517	0.952133
C3orf75	-0.0606654	3.55126	0.799079
C3orf78	-0.404378	0.38388	0.453112
C4orf21	-0.652495	3.88536	0.0408577
C4orf27	0.174963	5.09134	0.446364
C4orf29	-0.085698	3.21485	0.742995
C4orf3	0.370802	5.03894	0.0748457
C4orf32	0.408278	4.19278	0.123614
C4orf33	-0.286444	2.30209	0.354351
C4orf34	-0.368737	4.21583	0.179242
C4orf39	0.236017	0.866467	0.668617
C4orf42	0.0743834	4.95239	0.695247
C4orf43	-0.0139692	4.53814	0.949151
C4orf46	-0.279352	4.64894	0.22828
C4orf47	0.215117	0.300907	0.717787
C4orf48	0.0130972	0.324324	1
C4orf49	0.0777499	3.12492	0.80588
C4orf52	0.199369	2.94569	0.497795
C5	0.5412	2.21885	0.148168
C5orf15	-0.351239	6.03645	0.0754344
C5orf22	0.032702	4.30642	0.889442
C5orf24	-0.29415	7.17913	0.110145
C5orf25	0.232852	3.78263	0.305253
C5orf28	-0.269558	2.9413	0.360354
C5orf30	-0.0791779	5.38665	0.673697
C5orf34	-0.725734	3.06319	0.0334634
C5orf39	0.137456	2.02673	0.699877
C5orf4	-0.531681	0.55843	0.351802
C5orf41	0.694065	3.88216	0.0386252
C5orf42	-0.0622045	4.77802	0.764418
C5orf43	-0.115685	5.82972	0.520141
C5orf44	-0.217125	3.53114	0.414157
C5orf45	-0.0854499	1.86836	0.829146
C5orf51	-0.0754835	4.53643	0.720606
C5orf54	0.123847	2.32621	0.774257
C5orf55	-0.111873	1.43907	0.77612
C5orf56	0.598094	0.539783	0.280687
C5orf62	-0.307658	0.811796	0.593105
C5orf65	0.985807	1.24075	0.0647873
C6orf1	0.184002	4.76744	0.422697
C6orf106	0.0834219	5.85676	0.614521
C6orf108	0.589224	4.07658	0.023029
C6orf115	-0.0826594	4.53196	0.681844
C6orf120	-0.203188	5.13876	0.272638
C6orf130	0.339906	3.41501	0.219623
C6orf136	-0.0874396	3.51674	0.732208
C6orf147	-0.265837	1.42981	0.541283
C6orf162	0.127557	2.85288	0.674975
C6orf163	0.546008	0.729723	0.284258
C6orf164	0.614219	0.549046	0.255354
C6orf170	-0.337864	2.58851	0.346885
C6orf174	-0.49249	2.22473	0.193818
C6orf192	0.113955	2.9105	0.683247
C6orf203	-0.224524	3.3219	0.387415
C6orf211	-0.0347936	4.60885	0.881811
C6orf225	0.247306	3.26338	0.421754
C6orf226	0.629637	0.57169	0.253268
C6orf228	-0.253393	3.71119	0.319514
C6orf47	-0.0769409	3.42367	0.801544
C6orf48	0.416274	5.82209	0.0707113
C6orf57	0.312554	2.18728	0.364311
C6orf62	-0.359282	5.18467	0.0871221
C6orf70	0.082259	2.84737	0.761361
C6orf72	0.446707	4.71072	0.0494856
C6orf89	0.151453	5.27352	0.458538
C7orf10	0.470491	4.04544	0.0901523
C7orf11	0.740396	5.32089	0.00794336
C7orf13	-0.0592091	2.43102	0.868814
C7orf23	0.315702	3.10932	0.265287
C7orf25	-0.0115644	3.49885	0.968746
C7orf26	-0.312105	4.04406	0.211963
C7orf31	0.324682	2.60576	0.281184
C7orf41	0.146752	2.83613	0.608095
C7orf42	0.0683948	6.71429	0.677581
C7orf43	-0.384245	3.39484	0.193667
C7orf44	-0.085766	5.44696	0.63057
C7orf49	-0.432588	3.91454	0.106672
C7orf50	0.071349	5.78639	0.69821
C7orf58	0.367761	6.22254	0.118444
C7orf59	-0.173186	4.47044	0.454837
C7orf60	0.729045	2.92727	0.0245865
C7orf61	0.787921	3.48168	0.0285562
C7orf63	0.626559	1.89324	0.108853
C7orf70	-0.0700208	3.93518	0.753921
C7orf73	-0.218502	5.43792	0.229416
C8orf33	-0.229291	5.6416	0.203469
C8orf37	-0.0814772	3.60905	0.738154
C8orf38	-0.351987	2.22339	0.331349
C8orf39	0.68686	-0.0350858	0.326365
C8orf40	-0.3644	2.07009	0.277709
C8orf44	0.701667	0.467678	0.192724
C8orf48	0.338729	5.72111	0.10569
C8orf55	0.176532	5.30777	0.400627
C8orf58	-0.430339	4.2172	0.0786764
C8orf59	-0.326414	2.72119	0.371335
C8orf73	-1.08744	2.01995	0.0359751
C8orf82	-0.0914899	4.15126	0.689479
C8orf83	0.0977895	4.76052	0.626071
C9orf100	0.0845267	3.07174	0.759766
C9orf102	-0.291609	2.95462	0.300117
C9orf103	-0.0210258	0.116447	1
C9orf114	-0.354733	4.27583	0.150981
C9orf116	0.251493	2.68197	0.410926
C9orf117	-0.502878	1.99001	0.192736
C9orf123	0.30614	5.29184	0.133817
C9orf142	-0.38389	5.35746	0.0906786
C9orf156	-0.0224091	2.47847	0.947807
C9orf16	0.421575	5.71033	0.117369
C9orf163	-0.387406	0.0378289	0.527151
C9orf167	-0.432591	6.56939	0.0372805
C9orf169	-0.267593	0.10664	0.684654
C9orf172	-0.856795	1.56563	0.103051
C9orf21	0.137661	3.86017	0.550206
C9orf23	-0.00111571	2.93668	1
C9orf25	-0.0186944	4.94106	0.940504
C9orf3	-0.305565	2.17354	0.358475
C9orf30	0.0347754	4.36436	0.866528
C9orf37	0.246528	4.31308	0.331771
C9orf40	-0.289161	2.1062	0.398605
C9orf41	-0.6223	2.81881	0.0761916
C9orf46	-0.252825	2.52141	0.444574
C9orf5	0.188102	6.91524	0.285263
C9orf68	0.535471	0.552615	0.281977
C9orf69	-0.158601	6.10139	0.382981
C9orf7	0.202236	2.56135	0.548217
C9orf72	0.481484	2.65611	0.168738
C9orf78	-0.307361	6.61052	0.128404
C9orf80	-0.0912762	3.2251	0.745097
C9orf82	0.229264	4.04092	0.298055
C9orf85	0.47766	2.82197	0.150743
C9orf86	-0.211504	7.36511	0.237258
C9orf89	0.303192	4.82085	0.15665
C9orf9	0.228583	2.07773	0.47661
C9orf91	-0.438358	4.20168	0.116668
C9orf93	-0.418886	2.4887	0.273835
C9orf95	0.999883	1.99476	0.0234376
CA11	0.674915	3.68915	0.0297686
CA12	0.259817	3.65846	0.34044
CA13	-0.774967	1.45595	0.0841003
CA5B	0.0570895	3.0497	0.838416
CA5BP1	-0.57884	3.35186	0.0616982
CAB39	0.0205036	5.58088	0.908733
CAB39L	0.0558046	1.73694	0.876392
CABIN1	0.127346	7.50697	0.481527
CABLES1	1.12665	5.84306	0.00204501
CABLES2	-0.0416748	5.05042	0.823519
CABYR	0.297708	3.77235	0.268953
CACHD1	0.0602997	4.15537	0.787307
CACNA1A	1.07331	2.55527	0.00798581
CACNA2D1	-0.150749	4.17687	0.525118
CACNB1	-0.0142152	3.71992	0.960126
CACNB2	-0.424113	0.455649	0.451749
CACNB3	0.148793	5.6543	0.435407
CACNG6	1.12064	4.21412	0.00244103
CACNG7	0.327164	5.08615	0.162102
CACNG8	-0.157138	5.55536	0.5886
CACYBP	0.0881822	6.97151	0.646351
CAD	-0.295033	7.26096	0.182949
CADM4	1.68408	0.98911	0.00835232
CADPS2	0.308599	4.39652	0.173008
CALCOCO1	0.313885	6.60468	0.134435
CALCOCO2	0.185553	6.60906	0.345508
CALCRL	2.55936	2.91397	0.000877803
CALD1	0.0332286	8.36015	0.89544
CALHM2	0.17758	3.97246	0.435563
CALM1	-0.18797	8.20805	0.316052
CALM2	-0.26059	8.2564	0.193453
CALM3	0.0561209	8.14493	0.763721
CALML4	0.391005	4.41415	0.0942897
CALR	0.037647	10.0432	0.846079
CALU	0.0712531	9.25025	0.724182
CAMK1	-0.111013	4.92247	0.545519
CAMK2B	2.61398	1.04648	0.0028248
CAMK2D	0.330706	6.00568	0.12513
CAMK2G	-0.0346853	6.05917	0.854432
CAMK2N1	0.527548	4.52268	0.0649864
CAMK2N2	0.269206	2.61805	0.379709
CAMK4	-0.243267	3.05215	0.372777
CAMKK1	-0.0741994	3.84022	0.738573
CAMKK2	-0.127759	6.2235	0.430679
CAMKMT	0.109955	2.48837	0.723711
CAMLG	0.790335	5.47442	0.00719727
CAMSAP1	-0.230221	6.73185	0.240325
CAMSAP2	-0.241171	6.05572	0.161423
CAMTA1	0.575223	4.67093	0.0156504
CAMTA2	-0.104929	6.69022	0.543019
CAND1	-0.0801527	7.29298	0.655726
CANT1	-0.252057	7.35638	0.168179
CANX	-0.0647748	9.22375	0.730971
CAP1	-0.225649	7.65008	0.222419
CAP2	-0.383554	3.06338	0.1806
CAPG	0.243345	5.83152	0.194675
CAPN1	-0.28689	8.23975	0.129473
CAPN10	-0.0917658	3.45121	0.712602
CAPN12	-1.06149	0.723057	0.0624894
CAPN2	-0.150392	10.0364	0.446491
CAPN5	0.0294009	6.76832	0.859341
CAPN7	-0.062748	5.82207	0.706912
CAPNS1	-0.0895348	9.06035	0.639761
CAPRIN1	-0.0324052	8.79241	0.863338
CAPRIN2	-0.394597	7.88286	0.0710501
CAPS	0.101448	1.66041	0.845814
CAPS2	0.773505	1.91357	0.0605441
CAPZA1	-0.0942521	7.65337	0.596509
CAPZA2	-0.0303073	5.91885	0.871236
CAPZB	0.153085	7.69331	0.382544
CARD10	-0.000338399	5.15683	1
CARD11	-0.289171	3.80681	0.224573
CARD14	-0.515934	1.49516	0.270916
CARD16	0.998831	5.71994	0.00332447
CARD6	0.343974	5.34139	0.09343
CARD8	-0.0165702	6.85865	0.928229
CARHSP1	0.0103171	5.46645	0.953368
CARKD	-0.0200042	3.65532	0.944272
CARM1	-0.121142	7.50175	0.48229
CARS	-0.321321	6.12547	0.165309
CARS2	-0.259565	4.66779	0.218832
CASC2	-0.160648	0.551771	0.777232
CASC3	-0.141276	7.00142	0.418827
CASC4	0.0659997	6.52384	0.700478
CASC5	-0.465492	6.23529	0.0751685
CASD1	-0.0301519	3.41211	0.914481
CASK	0.310826	5.65913	0.102611
CASKIN2	-0.388379	5.81429	0.0683204
CASP1	1.04323	3.13115	0.00888489
CASP10	-0.00448686	3.0392	0.992285
CASP12	0.438569	1.80201	0.352762
CASP2	-0.441494	5.49334	0.0556561
CASP3	0.0836493	5.27524	0.711089
CASP4	0.287724	7.58899	0.114811
CASP6	0.00303166	3.2719	1
CASP7	0.299866	4.98526	0.127326
CASP8	0.0626117	5.70819	0.706281
CASP8AP2	-0.292034	6.02147	0.15344
CASP9	-0.179856	3.62596	0.494203
CAST	-0.201219	8.56447	0.275596
CASZ1	0.102304	0.317528	0.891191
CAT	-0.235659	5.49714	0.20088
CATSPER1	0.0641386	4.49387	0.762834
CATSPER2	-0.621554	1.30601	0.169478
CATSPERG	0.190205	1.0051	0.703321
CAV1	0.283472	9.54775	0.384108
CAV2	0.598203	6.48723	0.0321517
CBFA2T2	0.160612	5.77561	0.375891
CBFB	-0.330605	5.38622	0.0988898
CBL	-0.0735861	6.55366	0.696005
CBLB	0.200785	4.98464	0.401175
CBLL1	0.0589138	5.69948	0.729854
CBLN3	-0.568126	1.26348	0.252097
CBR1	0.111426	5.06493	0.580371
CBR3	0.156854	3.14463	0.549391
CBR3-AS1	-0.443348	1.00444	0.331574
CBR4	0.263224	4.78935	0.221684
CBS	-0.430963	4.47804	0.202382
CBWD1	-0.169648	1.27419	0.701156
CBWD2	-0.0840073	1.06114	0.854134
CBX1	0.136918	6.73595	0.426463
CBX2	-0.218696	5.58967	0.302511
CBX3	-0.113997	6.30247	0.532297
CBX4	-0.129794	6.01212	0.529749
CBX5	-0.0164003	8.26743	0.95317
CBX6	-0.26378	6.31012	0.240786
CBX7	0.536968	3.55279	0.0834251
CBX8	-0.0235425	3.19026	0.943166
CBY1	0.200363	4.13998	0.36925
CC2D1A	-0.170334	6.54301	0.31513
CC2D1B	-0.312567	5.54912	0.126597
CC2D2A	-0.0968154	4.73917	0.600193
CCAR1	-0.465678	6.93157	0.0232399
CCBE1	0.980446	6.96021	0.00464908
CCBL1	0.510547	3.7245	0.0534956
CCBL2	0.592789	3.38756	0.0514247
CCDC101	-0.374227	4.01546	0.152299
CCDC102A	-0.0117606	3.71717	0.967535
CCDC102B	0.615095	3.62852	0.0306998
CCDC103	-0.186252	2.25404	0.570678
CCDC104	0.280413	5.2235	0.187859
CCDC106	0.491697	3.45205	0.103019
CCDC107	-0.194664	0.624693	0.746345
CCDC109B	-0.103083	4.00151	0.650877
CCDC11	1.2894	0.307314	0.0443453
CCDC110	0.0935705	0.526451	0.89071
CCDC111	0.195285	3.586	0.428497
CCDC112	0.062131	5.40168	0.761465
CCDC113	0.344507	2.98019	0.314141
CCDC115	-0.0872404	4.6368	0.686662
CCDC117	0.196672	4.42531	0.342712
CCDC12	0.127593	4.24664	0.550606
CCDC120	0.153485	1.75589	0.669179
CCDC121	-0.238518	1.77875	0.497078
CCDC122	-0.00915331	1.70162	1
CCDC124	-0.151373	7.01259	0.415505
CCDC125	0.21135	3.98558	0.360651
CCDC126	0.304883	1.52435	0.426588
CCDC127	-0.063706	4.01691	0.767069
CCDC130	0.0296208	4.97367	0.876114
CCDC132	0.248893	4.28098	0.294424
CCDC134	-0.113706	2.27769	0.727721
CCDC136	0.250165	3.70005	0.301412
CCDC137	-0.656292	5.13935	0.0170888
CCDC138	-0.378701	2.18732	0.355363
CCDC14	-0.0227877	6.68828	0.911011
CCDC142	-0.212442	3.5406	0.448804
CCDC144NL	-0.87105	1.78841	0.0400496
CCDC146	0.595953	1.49221	0.193308
CCDC147	1.47208	0.940175	0.0160578
CCDC15	-0.540274	3.71279	0.0406936
CCDC150	-0.139966	2.66602	0.674775
CCDC151	0.208294	1.49533	0.611235
CCDC152	-0.64277	1.4133	0.146379
CCDC153	0.676171	0.565274	0.181782
CCDC159	0.319464	3.43474	0.232073
CCDC163P	0.288625	2.24455	0.356155
CCDC165	0.159403	7.10458	0.40228
CCDC167	-0.232795	4.38348	0.388959
CCDC17	-0.571038	1.44932	0.261403
CCDC18	-0.21876	4.58627	0.352735
CCDC19	1.56102	0.067524	0.0270672
CCDC22	-0.36442	4.20418	0.118257
CCDC23	0.259195	1.80411	0.458762
CCDC24	-0.0148864	3.62042	0.967015
CCDC25	0.18502	4.35012	0.381995
CCDC28A	0.115512	3.36353	0.673476
CCDC28B	0.557017	2.13565	0.109844
CCDC34	-0.298484	5.26847	0.114497
CCDC39	-0.860244	0.693504	0.134364
CCDC40	0.719411	1.60692	0.103941
CCDC41	-0.441592	3.67663	0.0827055
CCDC43	0.0627735	5.56647	0.722954
CCDC47	-0.118422	6.9115	0.493657
CCDC50	0.30856	7.03919	0.129897
CCDC51	0.146848	3.87164	0.529785
CCDC53	-0.0449441	5.25631	0.812185
CCDC56	-0.143354	4.64241	0.45983
CCDC57	-0.00729233	3.54024	0.983615
CCDC58	-0.392025	4.47057	0.138781
CCDC59	0.269877	5.60497	0.141381
CCDC6	-0.126458	6.34253	0.451804
CCDC61	-0.252244	2.25287	0.441638
CCDC62	0.280198	0.351553	0.624657
CCDC65	0.0410905	1.7565	0.912046
CCDC66	-0.108932	4.41993	0.580163
CCDC68	-0.565838	5.40469	0.0240325
CCDC69	0.303532	5.7994	0.0946787
CCDC71	0.17533	4.88319	0.385311
CCDC71L	0.0227304	4.11669	0.926888
CCDC72	-0.344589	4.33799	0.17673
CCDC74B	-0.573683	0.716171	0.330658
CCDC75	-0.163785	3.8461	0.467048
CCDC76	-0.0769713	3.39982	0.761109
CCDC77	-0.325576	4.44504	0.122654
CCDC78	-0.337479	1.79046	0.441349
CCDC80	0.626305	8.20313	0.0237725
CCDC81	0.604645	0.213502	0.341828
CCDC82	0.000562186	5.01025	0.999393
CCDC84	-0.263327	4.88771	0.218871
CCDC85A	0.910734	0.630512	0.090479
CCDC85B	0.235556	7.0532	0.377742
CCDC85C	-0.573723	6.32524	0.00927403
CCDC86	-0.213855	7.00128	0.268724
CCDC88A	-0.254776	7.71934	0.222113
CCDC88B	-0.129277	2.36686	0.70339
CCDC88C	0.247097	5.68999	0.158781
CCDC9	-0.0131317	3.90732	0.96367
CCDC90A	0.035589	4.18054	0.867802
CCDC90B	0.18687	6.12519	0.294303
CCDC91	0.0123575	5.5533	0.948699
CCDC92	1.07398	5.75984	0.00110637
CCDC93	-0.00358069	5.65885	0.984353
CCDC94	-0.214006	5.27523	0.275607
CCDC96	-0.533788	1.19505	0.227375
CCDC97	-0.38925	5.78365	0.0496827
CCDC99	0.112176	6.61296	0.55654
CCHCR1	-0.0217258	4.63357	0.917081
CCL2	1.40007	4.46087	0.000991745
CCL5	0.675784	0.758393	0.20555
CCM2	-0.121039	5.42716	0.514424
CCNA2	-0.172505	6.72817	0.415537
CCNB1	-0.0972756	6.72779	0.657049
CCNB1IP1	0.328996	5.94517	0.132655
CCNB2	-0.0788241	6.01322	0.716684
CCNB3	0.602302	1.19318	0.24251
CCNC	0.221592	5.18955	0.304506
CCND1	-0.0807386	9.98306	0.687517
CCND3	-0.527906	5.13901	0.027522
CCNDBP1	-0.336163	4.56895	0.185847
CCNE1	-0.351579	4.51524	0.11695
CCNE2	-0.514148	3.51506	0.0661763
CCNF	-0.217674	6.28887	0.300785
CCNG1	0.52956	6.88081	0.0416405
CCNG2	0.825542	3.89476	0.00893582
CCNH	0.262829	5.15706	0.156551
CCNI	0.326143	7.83	0.0960502
CCNJ	-0.145189	3.72257	0.556757
CCNJL	-0.0774539	3.91709	0.737603
CCNK	-0.0777734	7.05323	0.645614
CCNL1	0.0624661	6.335	0.710552
CCNL2	0.151373	5.65165	0.431593
CCNO	-0.128024	1.97329	0.73939
CCNT1	0.0296667	5.84861	0.860015
CCNT2	-0.229681	6.01026	0.225882
CCNY	-0.0100123	6.72924	0.952036
CCNYL1	0.0205335	5.21171	0.909746
CCP110	-0.311039	5.51968	0.102517
CCPG1	0.299541	4.48634	0.24116
CCR10	0.806552	0.808544	0.11611
CCRL1	-0.400955	-0.0905652	0.618304
CCRL2	-0.0163407	2.40511	0.966827
CCRN4L	-0.341756	3.35832	0.189913
CCS	-0.0851429	4.64649	0.659629
CCT2	-0.093079	8.00185	0.599685
CCT3	-0.0896569	8.44808	0.633088
CCT4	-0.0307068	7.89097	0.86129
CCT5	-0.0533445	8.24514	0.769998
CCT6A	-0.409572	8.3604	0.0545607
CCT6P1	-0.0756222	2.22346	0.826081
CCT6P3	0.0746343	2.29342	0.827354
CCT7	-0.0732124	8.22893	0.682973
CCT8	0.0654191	7.95007	0.722133
CCZ1	-0.0517153	5.2188	0.768229
CCZ1B	-0.0753569	5.43315	0.66396
CD109	0.399625	7.32652	0.100744
CD151	-0.117188	8.98087	0.536209
CD163L1	0.209924	6.16335	0.258397
CD164	-0.167757	7.43848	0.353774
CD177	1.95646	1.94725	0.0034714
CD1D	1.06699	0.630993	0.0591889
CD274	0.337908	3.26342	0.202251
CD276	-0.185009	6.77374	0.324401
CD2AP	-0.156575	5.71308	0.374192
CD2BP2	-0.113659	6.43017	0.54888
CD300C	-1.03774	0.319348	0.134722
CD320	-0.0653456	6.54431	0.692871
CD33	-0.332141	4.16656	0.177381
CD34	1.04008	4.51127	0.009811
CD36	3.26559	0.706431	0.00134953
CD37	-0.102821	2.08784	0.769326
CD3EAP	-0.536137	2.26738	0.127994
CD40	0.608933	5.07294	0.0212424
CD44	0.0721729	10.1747	0.716739
CD46	0.269172	6.66271	0.191353
CD47	0.219841	6.753	0.268263
CD53	-0.0160093	1.47636	0.983901
CD55	0.20691	7.44947	0.36934
CD58	-0.0171125	4.21693	0.943769
CD59	0.123253	11.1779	0.561305
CD63	-0.00642748	8.65201	0.974412
CD68	-0.184574	8.01676	0.353659
CD70	0.0792736	4.23278	0.699959
CD74	1.30858	1.96571	0.0148036
CD79B	0.664031	0.0987238	0.360561
CD81	0.0768103	7.6693	0.655165
CD82	1.04237	4.76021	0.00263777
CD9	0.930543	9.48024	0.00396242
CD93	0.27534	8.67659	0.239882
CD97	-0.56091	2.98786	0.0590892
CD99	0.452036	7.81025	0.038502
CD99L2	0.247743	7.04576	0.162331
CD99P1	0.0229162	3.03143	0.935409
CDA	-0.161119	0.896843	0.712148
CDADC1	0.172378	2.1878	0.596718
CDAN1	-0.268651	3.95722	0.235426
CDC123	-0.183987	6.56368	0.286929
CDC14A	0.214891	3.38271	0.377295
CDC14B	-0.129766	3.34335	0.621462
CDC16	-0.107306	5.09489	0.55203
CDC20	-0.175872	8.11436	0.407226
CDC23	0.0900285	6.17133	0.595318
CDC25A	-0.76935	4.01162	0.0215316
CDC25B	-0.30609	7.86214	0.12892
CDC25C	0.0553681	4.72186	0.810065
CDC26	0.183316	4.68256	0.341321
CDC27	-0.0457901	7.83364	0.806482
CDC34	-0.0464515	5.91928	0.796496
CDC37	-0.00127613	8.67316	0.994681
CDC37L1	-0.0595726	2.14364	0.865508
CDC40	0.0308797	4.72481	0.886418
CDC42	0.0573249	7.55185	0.787996
CDC42BPA	0.0997924	7.63374	0.583746
CDC42BPB	-0.219698	8.39987	0.254178
CDC42EP1	-0.22132	6.97167	0.25501
CDC42EP2	-0.654975	6.48702	0.0306735
CDC42EP3	0.0673028	6.53629	0.767932
CDC42EP4	-0.00722508	5.96539	0.968938
CDC42EP5	0.581664	2.3431	0.128707
CDC42SE1	-0.381136	5.59461	0.0540611
CDC42SE2	0.107386	5.41163	0.570206
CDC45	-0.365222	4.97681	0.100391
CDC5L	-0.164256	5.90449	0.334566
CDC6	-0.349099	6.01492	0.146544
CDC7	-0.159131	5.01759	0.433674
CDC73	-0.173926	4.88208	0.350597
CDCA2	-0.319193	5.51854	0.133216
CDCA3	-0.389786	5.31016	0.102036
CDCA4	-0.181675	6.22893	0.284911
CDCA5	-0.417491	5.85586	0.0541562
CDCA7	-0.413492	4.46559	0.142894
CDCA7L	0.461478	5.94177	0.0335296
CDCA8	-0.253003	5.88063	0.243173
CDCP1	3.34008	1.12958	0.000902405
CDH12	0.518836	2.9136	0.0974332
CDH13	0.29554	4.3802	0.227666
CDH18	0.8353	1.4371	0.0872454
CDH2	0.286882	7.70269	0.147831
CDH24	0.0409032	4.72723	0.834853
CDH5	0.542282	9.48807	0.0353362
CDH7	-0.280742	-0.00639746	0.682283
CDIPT	-0.186909	5.72878	0.298633
CDK1	-0.166499	5.54698	0.50256
CDK10	-0.137504	5.069	0.460786
CDK11A	-0.0358623	4.75258	0.873222
CDK11B	0.052402	5.61848	0.786153
CDK12	-0.476157	7.04312	0.0318758
CDK13	-0.0264304	5.93662	0.871255
CDK14	0.153527	3.70626	0.509197
CDK16	-0.0258081	7.33537	0.878425
CDK17	-0.123912	6.6264	0.457273
CDK19	-0.0761009	3.61212	0.757616
CDK2	-0.339762	6.60536	0.0841174
CDK2AP1	0.186968	5.77707	0.328891
CDK2AP2	-0.191178	6.42348	0.254929
CDK4	-0.109998	7.78922	0.57275
CDK5	-0.162328	4.7595	0.46903
CDK5R1	-0.0722448	1.71035	0.853837
CDK5RAP1	-0.0186083	5.73786	0.911715
CDK5RAP2	-0.00735475	6.56886	0.967008
CDK5RAP3	0.161971	5.97031	0.350679
CDK6	-0.364675	5.1536	0.081186
CDK7	0.0940296	5.28803	0.619429
CDK8	0.141059	3.91878	0.518947
CDK9	0.00127616	6.39854	0.995161
CDKAL1	0.0142264	3.44215	0.964336
CDKL1	-0.00469203	2.92101	0.991385
CDKL2	0.348721	-0.0615596	0.616988
CDKL3	0.295253	0.857076	0.526602
CDKL5	-0.0754241	2.48436	0.855565
CDKN1A	-0.0446603	7.73179	0.805844
CDKN1B	0.546182	5.01818	0.0200626
CDKN2AIP	0.0311755	3.65901	0.89205
CDKN2AIPNL	-0.0292367	5.5964	0.862928
CDKN2C	0.281387	4.00606	0.247673
CDKN2D	-0.199271	3.06709	0.481132
CDKN3	0.297746	5.87939	0.184136
CDNF	0.38705	0.199924	0.483995
CDON	0.485985	1.02987	0.310214
CDR1	0.81703	0.166609	0.203707
CDR2	0.524623	5.24485	0.0274811
CDR2L	-0.391708	5.83901	0.0695938
CDS2	0.310329	6.10729	0.078767
CDSN	0.249493	1.49241	0.55282
CDT1	0.00350859	6.42181	0.984249
CDV3	-0.410243	7.93407	0.0520915
[truncated: 10,350 more rows]

## Sheet: DEGs
Symbol	logFC	logCPM	PValue	alias
TNFSF15	3.97511	4.0157	0.000572537
ITGA11	3.64422	0.0538174	0.00109227
CDCP1	3.34008	1.12958	0.000902405
PTP4A3	3.2757	1.71055	0.000561079
CD36	3.26559	0.706431	0.00134953
CEACAM20	3.26169	0.0753187	0.00224077
DMBT1	3.25337	0.641241	0.00120459
KCNMB4	3.11136	2.48086	0.000447625
FAM81B	2.94941	0.0139132	0.00686856
IL4I1	2.83505	0.528589	0.00741349
CTSO	2.81211	2.15906	0.00137641
ABCB4	2.73216	0.384083	0.00246161
C10orf10	2.70465	2.78339	0.00123549
GBP2	2.70189	3.30282	0.000574541
STON1	2.68305	0.910195	0.00320919
CAMK2B	2.61398	1.04648	0.0028248
CEACAM22P	2.58499	1.34864	0.00442609
BGN	2.57665	1.52585	0.00234416
CALCRL	2.55936	2.91397	0.000877803
ARNT2	2.44961	0.228013	0.00531358
ITGA10	2.4302	4.94239	0.000633423
MUC15	2.31984	2.44664	0.00244628
MMRN1	2.31082	3.80131	0.00174382
SGIP1	2.26763	0.920736	0.0131225
TEX19	2.24913	-0.237495	0.0147868
LOC152225	2.23527	0.264092	0.00515874
CYP1A1	2.19212	3.58122	0.00105219
C19orf45	2.192	0.173024	0.0113359
TP53I11	2.15461	2.94668	0.000814921
RASGRP3	2.13872	0.909949	0.00589385
TXLNB	2.13818	0.628136	0.00516091
JUP	2.13618	7.02708	0.000312899
SLITRK4	2.05792	-0.252687	0.0107875
PLB1	2.01862	0.38648	0.009335
KCNAB2	2.01678	1.96277	0.00157602
NES	2.01094	0.900924	0.00345643
MAP2	1.9736	2.34682	0.00203628
OTOA	1.97135	0.327468	0.0118586
CD177	1.95646	1.94725	0.0034714
FLJ46906	1.9335	1.06055	0.0088185
GPNMB	1.91242	1.36086	0.00367547
FAM113B	1.86558	2.18144	0.00190496
MMP10	1.85394	0.827622	0.0183807
KCNK3	1.85111	0.341387	0.0235622
MLIP	1.84323	0.632719	0.00995692
NTNG2	1.83017	0.841269	0.012215
DYSF	1.82654	7.64558	0.000569745
ADSSL1	1.82608	1.23353	0.0050238
SLC29A4	1.82601	2.34427	0.00119437
RELN	1.81977	2.634	0.00423018
CSF2	1.80884	1.12309	0.00501401
PLA2G4C	1.7946	0.562516	0.0103319
LOC728730	1.77607	1.50779	0.00593614
PTGS1	1.77604	1.75575	0.0152607
DLL4	1.7396	0.962729	0.00732531
PITPNC1	1.72514	1.17916	0.00722563
ACP5	1.71266	1.4297	0.0236405
YPEL4	1.709	0.239862	0.0141661
GBP4	1.70422	0.460336	0.0410543
CHST1	1.69655	2.08522	0.00406642
CADM4	1.68408	0.98911	0.00835232
CLEC2B	1.68112	2.35632	0.00411805
FAM174B	1.6664	3.86166	0.000797641
NOX4	1.66495	4.43191	0.00199357
FAM116B	1.65079	0.709193	0.011942	DENND6B
COL12A1	1.65073	0.789753	0.0183692
BST2	1.62251	0.100753	0.026342
MOV10L1	1.61763	0.241227	0.0240041
APLN	1.60882	7.68705	0.00391752
TXNIP	1.60667	5.5664	0.00542817
RCOR2	1.59807	1.12598	0.00712955
PART1	1.58363	0.196659	0.0372068
MAPT	1.57811	3.22998	0.0011191
FXYD1	1.57242	0.79385	0.0255819
ALDH1A1	1.57218	6.57026	0.000708456
WISP2	1.56465	3.03291	0.00837745
MRC2	1.5638	4.74204	0.000414165
CCDC19	1.56102	0.067524	0.0270672
JAG2	1.55962	1.46884	0.00755099
FRAS1	1.55655	1.37889	0.0101229
ENAM	1.55451	4.21667	0.00610094
STC1	1.55097	7.69604	0.0109535
C1QL1	1.54734	1.55291	0.030886
HLA-DRA	1.54611	0.563071	0.045823
BMF	1.54147	2.08134	0.00831266
MTUS1	1.53229	7.76425	0.00172505
SEMA3E	1.53057	0.702577	0.0294877
PIK3IP1	1.52632	1.25293	0.0328362
LYVE1	1.51803	0.314032	0.0256223
C21orf7	1.50071	2.70381	0.00184667
KDR	1.49926	5.00324	0.000608639
BFSP1	1.4924	4.13541	0.000699709
FAIM2	1.4901	0.649141	0.0135443
SCUBE1	1.48773	1.40628	0.020118
ST3GAL5	1.48281	1.86488	0.0088133
PIGZ	1.47959	1.72038	0.00726385
ADAMTS7	1.47366	6.08287	0.000818348
CCDC147	1.47208	0.940175	0.0160578
VWF	1.46311	3.08163	0.00418154
RGS5	1.45991	7.20353	0.00165379
FBXO32	1.45962	0.498273	0.0239686
JPH4	1.45366	0.846486	0.0150725
IGSF23	1.45047	0.25601	0.0344178
ABCA8	1.44674	3.5913	0.0104887
CRTAC1	1.44141	1.27187	0.0199862
GPR124	1.44038	0.635476	0.0182692
LOC100131089	1.43923	0.313173	0.031774
SIRPB2	1.43535	5.89021	0.00213731
LOC440028	1.42985	1.85827	0.00771898
HLA-B	1.41925	0.869352	0.0177403
AMOT	1.40704	0.517169	0.0481918
CST1	1.40348	11.5182	0.00301702
CCL2	1.40007	4.46087	0.000991745
PTGIS	1.39374	2.07081	0.0163455
FBXO36	1.39257	1.86549	0.0118795
HIST1H2AC	1.38572	-0.0110761	0.0469313
LOC283404	1.38416	0.740561	0.0237984
EFEMP1	1.37456	11.8902	0.00667525
CPE	1.3681	1.81774	0.00596803
LHPP	1.35269	3.29426	0.00189005
SMAD1	1.35117	1.44621	0.0150911
PDGFB	1.34308	4.53138	0.00600335
OVGP1	1.33816	1.31522	0.0120852
TRAPPC6A	1.33688	1.2977	0.0127208
SNED1	1.32154	1.11642	0.0234679
LOC375190	1.31996	0.269135	0.0344477
NPR3	1.31679	1.18015	0.0195316
LOC100287036	1.31346	1.8194	0.00833681
LINC00312	1.31265	0.620676	0.0407535
PMEL	1.3111	2.06358	0.00614719
CD74	1.30858	1.96571	0.0148036
SLC12A5	1.29966	2.22269	0.005243
C13orf15	1.29778	2.08403	0.00797475	RGCC
IRAK2	1.29518	5.73561	0.000710269
LOC554206	1.2934	0.607646	0.0343726
CCDC11	1.2894	0.307314	0.0443453
GPR155	1.28323	2.2861	0.0119726
TMEM71	1.27715	0.682612	0.037345
KLF9	1.27366	3.03782	0.00443379
MUSK	1.27199	1.31095	0.025837
FAM131C	1.27043	2.06364	0.0137209
ALDH1L1	1.26893	2.66038	0.0049726
KLHL24	1.26004	4.1281	0.00312547
TACSTD2	1.25535	3.96008	0.00203152
SH2D5	1.25324	0.688027	0.0499198
EXD3	1.25049	2.61624	0.00517396
EFNA1	1.24536	1.11786	0.0172012
YPEL1	1.24522	2.65465	0.0128344
PPL	1.23909	3.26949	0.0154611
FAM108C1	1.23907	4.54868	0.00124027
LOC728743	1.23822	0.777499	0.0363375
CELSR2	1.2374	0.48117	0.0480766
TFPI2	1.23336	0.783179	0.0370885
SERHL	1.23008	0.56101	0.0492849	SERHL2
SYCE1L	1.2299	2.57063	0.00804725
FAM212A	1.22953	1.18417	0.018811
TMEM158	1.22281	5.57768	0.00501422
GOLGA6L5	1.21769	0.599157	0.0358917
LOC254896	1.20986	1.05901	0.0395673
NEBL	1.20903	4.08623	0.00468067
ZC3H6	1.20697	4.10873	0.0102778
APOL3	1.20615	3.5635	0.00526429
LOC730101	1.20408	5.50295	0.00396378
IFI44L	1.20305	2.43785	0.0239101
FER1L4	1.20303	1.67929	0.0322807
ADC	1.20272	1.77094	0.0195636
F11R	1.20136	4.49014	0.00346668
IL8	1.19866	3.81978	0.0170914
SETD6	1.19245	1.93581	0.0124437
REPS2	1.19114	2.4919	0.0148419
APOBEC3H	1.18915	0.68882	0.0423594
PPARA	1.1872	3.10177	0.0142482
IFITM10	1.18357	1.20616	0.0313626
KIAA1211	1.18076	2.25536	0.013929
ACSF2	1.17956	4.63649	0.00121856
LOC100288911	1.17843	2.27748	0.00886984
THSD4	1.17659	6.62856	0.00270116
LOC284751	1.17626	1.56641	0.014991
SAMD13	1.17541	0.658033	0.0492181
TRAPPC2P1	1.17073	0.572556	0.037006
SH3BP5	1.16838	4.65385	0.00554378
ZNF521	1.16419	5.89906	0.0030295
HIC1	1.16384	1.07805	0.0264711
SYNGR3	1.15921	2.55938	0.0119877
PPP1R16B	1.15634	3.84226	0.00268141
PDK4	1.15147	1.38935	0.0304212
PLSCR4	1.14777	6.40176	0.00149933
EFNA4	1.14607	3.24288	0.0040827
LTBP1	1.14291	4.88678	0.00523502
CYP2U1	1.14167	2.18815	0.0110765
EVI2A	1.1372	3.80735	0.013081
RASA4	1.13493	3.96666	0.00363404
NOXA1	1.13253	1.6015	0.0208616
PSG4	1.13117	3.49953	0.00501198
EEF1A2	1.12669	2.30298	0.00949974
CABLES1	1.12665	5.84306	0.00204501
ERO1LB	1.12655	1.21355	0.0303621
ZNF467	1.1252	3.68962	0.0063357
PDE4B	1.12413	6.56718	0.0010824
MMP11	1.12311	0.988602	0.0350735
CACNG6	1.12064	4.21412	0.00244103
C20orf160	1.12038	3.51348	0.022592	CCM2L
C14orf28	1.12002	1.35342	0.0344581
KCNU1	1.11736	0.778243	0.0421971
P4HA3	1.11726	2.39428	0.0152252
LRRC33	1.11684	1.74568	0.0151444
LOC100505702	1.10678	1.13617	0.043724
LOC653061	1.10323	1.41365	0.0375202
MDK	1.1011	8.8845	0.00117237
TFPI	1.0965	7.90793	0.00189766
KCNJ2-AS1	1.09471	2.1328	0.0210848
PPP1R3B	1.09268	5.38441	0.00163238
FCGRT	1.09045	2.92143	0.00644048
FAM131B	1.08927	2.89717	0.00641955
DPM3	1.08561	3.98615	0.00425673
TESK2	1.08481	1.36772	0.0255923
FAM24B	1.08346	2.82322	0.0208049
AMN1	1.08318	3.66172	0.0093266
WDR65	1.08097	4.29742	0.00276817
CLIP3	1.07774	4.61361	0.00268196
CCDC92	1.07398	5.75984	0.00110637
CACNA1A	1.07331	2.55527	0.00798581
PALM	1.06484	2.91705	0.00805092
RPL22	1.06399	8.56045	0.00181702
HOXB3	1.06102	1.31525	0.0310818
HSD17B14	1.05841	4.40812	0.00253508
GSDMB	1.05839	3.45934	0.0092248
ARSG	1.05552	2.36436	0.00890321
FGA	1.04994	0.823802	0.047998
DBP	1.04815	1.44007	0.0332028
PLEK2	1.04756	3.36262	0.0302393
PDLIM1	1.04644	5.66327	0.00161929
KLHDC8B	1.04535	1.94787	0.0153382
CRYL1	1.04365	3.11161	0.00766792
CASP1	1.04323	3.13115	0.00888489
CD82	1.04237	4.76021	0.00263777
IL17RD	1.04125	1.27979	0.0433732
CD34	1.04008	4.51127	0.009811
FLJ41200	1.03708	6.536	0.00432612
PAQR8	1.03266	3.54995	0.00452245
CST4	1.032	4.10045	0.00830327
NUDT6	1.03075	1.13912	0.0350537
DFNB31	1.02942	4.59019	0.00604494
C1orf38	1.02806	1.74914	0.0283928	THEMIS2
GIMAP4	1.02591	2.75411	0.0302262
DKK3	1.02582	5.90858	0.00171347
UGT8	1.02551	0.960619	0.0465906
HEY1	1.02508	2.31975	0.0130258
SORBS2	1.02491	4.26345	0.0179014
MDGA1	1.02449	3.51783	0.0074893
MCAM	1.02403	6.19184	0.00343644
VAT1L	1.02177	6.76124	0.00228669
SELM	1.0117	4.09911	0.00431323
SH2D3C	1.01145	4.0318	0.00398309
DHRS3	1.01112	2.73992	0.0307984
SYNGR1	1.00931	2.46669	0.0202917
MSRB2	1.00845	1.39011	0.0299334
SPTBN4	1.00337	1.51548	0.0436784
TMEM200C	-1.00644	4.0283	0.00298935
ST6GALNAC1	-1.01009	2.26701	0.016529
PSAT1	-1.0113	5.65377	0.00647812
TUBB2B	-1.02516	2.13676	0.0156905
SULT1B1	-1.03476	3.47416	0.0158763
KCND1	-1.04238	2.72063	0.0355421
LOC100287314	-1.04262	5.4325	0.00399702
NDUFB1	-1.04674	1.80521	0.0472943
C12orf45	-1.04808	3.7517	0.00968098
TUBB2A	-1.04881	3.83659	0.00406427
MIR17HG	-1.05866	1.51528	0.0227015
FERMT1	-1.07126	5.57757	0.00115184
CXCL1	-1.07178	1.98653	0.0150574
CPA4	-1.07505	8.60468	0.00250448
MIR3064	-1.07969	1.44019	0.0226286	DDX5
DHCR24	-1.08001	5.16016	0.00688934
ZDHHC11	-1.08166	2.223	0.0257231
C8orf73	-1.08744	2.01995	0.0359751
MATL2963	-1.11016	1.88589	0.0240522
GPR17	-1.11102	1.15017	0.0368049
HKDC1	-1.1511	2.48321	0.00904561
LIPG	-1.17637	3.60647	0.0078582
TRIB3	-1.17745	6.78636	0.029852
FAM66E	-1.20579	0.365521	0.0476228
SLC1A5	-1.21912	6.87777	0.0025089
CIRBP-AS1	-1.22013	1.32272	0.0337936
ASNS	-1.22161	5.46843	0.0118749
ATAD3B	-1.23022	3.40394	0.00416717
RHOF	-1.23245	4.81245	0.00864192
ASAH2	-1.25009	0.332772	0.0446834
LOC150381	-1.26053	1.2824	0.0168236
NCF2	-1.27441	2.75104	0.0179256
SLC1A4	-1.28066	3.16553	0.00475509
PRR22	-1.29391	2.06457	0.0124953
SNORD88B	-1.30218	0.860643	0.0331317
HOXD4	-1.30682	0.87853	0.0264323
IL1RL1	-1.31375	4.84077	0.0028491
SPTBN5	-1.33732	1.5274	0.01484
NOS3	-1.37131	8.93252	0.00120058
SNORD110	-1.37443	0.0658873	0.0410288	NOP56
UCKL1-AS1	-1.38831	0.785168	0.0389185
IGFBP3	-1.41318	4.98772	0.00153051
PLEKHG6	-1.42746	0.470077	0.0346542
DISP2	-1.4365	4.25639	0.000793231
IL20RB	-1.45351	2.19357	0.00907222
DOK3	-1.48245	1.10891	0.0241879
C12orf34	-1.49188	4.33971	0.000832852	FAM222A
SLC7A5	-1.62479	6.40504	0.00189679
ANGPT4	-1.64332	0.478745	0.0138627
PTGDS	-1.84993	1.02675	0.0188305
ATG9B	-1.85738	2.9292	0.00205546
KRTAP4-8	-2.13399	0.836469	0.00874889
CHAC1	-2.25989	2.60262	0.0196996
